# Supplementary material
Source: PubMed Central journal article supplement (PMC3150510)
Supplement: NIHMS311647-supplement-Supplementary_Data.pdf [file NIHMS311647-supplement-Supplementary_Data.pdf]

## Genome-wide meta-analyses identifies three loci associated with primary biliary cirrhosis

Xiangdong Liu, Pietro Invernizzi, Yue Lu, Roman Kosoy, Yan Lu, Ilaria Bianchi, Mauro Podda, Chun Xu, Gang Xie, Fabio Macciardi, Carlo Selmi, Sara Lupoli, Russell Shigeta, Michael Ransom, Ana Lleo, Annette T. Lee, Andrew L. Mason, Robert P. Myers, Kevork M. Peltekian, Cameron N. Ghent, Francesca Bernuzzi, Massimo Zuin, Floriano Rosina, Elisabetta Borghesio, Annarosa Floreani, Roberta Lazzari, Grazia Niro, Angelo Andriulli, Luigi Muratori, Paolo Muratori, Piero L. Almasio, Pietro Andreone, Marzia Margotti, Maurizia Brunetto, Barbara Coco, Domenico Alvaro, Maria C. Bragazzi, Fabio Marra, Alessandro Pisano, Cristina Rigamonti, Massimo Colombo, Marco Marzioni, Antonio Benedetti, Luca Fabris, Mario Strazzabosco, Piero Portincasa, Vincenzo O. Palmieri, Claudio Tiribelli, Lory Croce, Savino Bruno, Sonia Rossi, Maria Vinci, Cleofe Prisco, Alberto Mattalia, Pierluigi Toniutto, Antonio Picciotto, Andrea Galli, Carlo Ferrari, Silvia Colombo, Giovanni Casella, Lorenzo Morini, Nicola Caporaso, Agostino Colli, Giancarlo Spinzi, Renzo Montanari, Peter K. Gregersen, E. Jenny Heathcote, Gideon M. Hirschfield, Katherine A. Siminovitch, Christopher I. Amos, M. Eric Gershwin, and Michael F. Seldin.

### Supplementary Information

1. **Supplementary Figure 1.** Principal components analysis (PCA) showing selection of homogeneous Italian cases and controls.
2. **Supplementary Figure 2.** Haplotype analysis of PBC susceptibility regions on chromosomes 17 and 19.
3. **Supplementary Table 1.** Summary of Subject Genotyping Information
4. **Supplementary Table 2.** Summary of Association Tests for Italian PBC and combined Italian PBC and Canadian PBC study
5. **Supplementary Table 3.** Analysis of *IL12A/SCHIP1* SNPs
6. **Supplementary Table 4.** Comparison of Meta-Analyses containing all PBC Cases and AMA only Cases
7. **Supplementary Table 5.** Comparison of PBC and Celiac Association for *SCHIP1/IL12A* Region
8. **Supplementary Methods.**

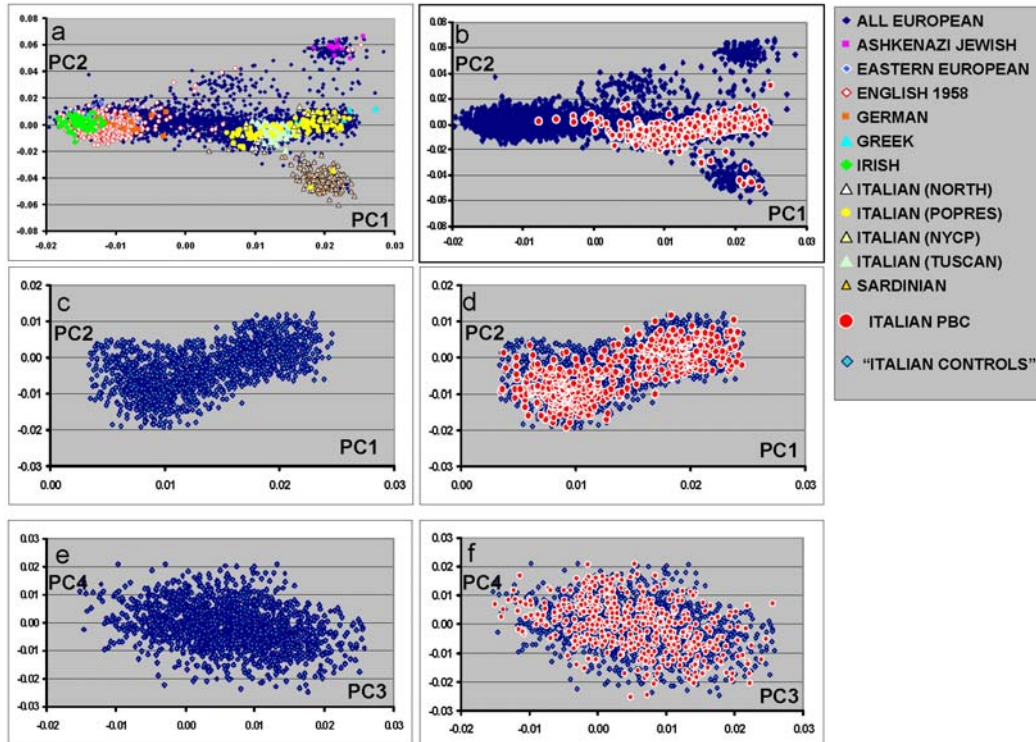

**Supplementary Figure 1.** (a - f) Principal components analysis (PCA) showing selection of homogeneous Italian cases and controls. PCA was performed using a large set of diverse European individuals (see Methods) and 34,000 SNPs distributed throughout each autosome excluding those with strong linkage disequilibrium. (a) Shows a plot of principal component (PC) 2 against PC1 with selected color coded European population groups. (b) Highlights the PBC cases collected in Italy (492 cases) in PC2/PC1 plot. (c and d) Shows the PC2/PC1 plot of homogeneous Italian controls and cases selected as described in Methods. (e and f) Shows the PC4/PC3 plot of homogeneous Italian controls and cases selected as described in Methods.

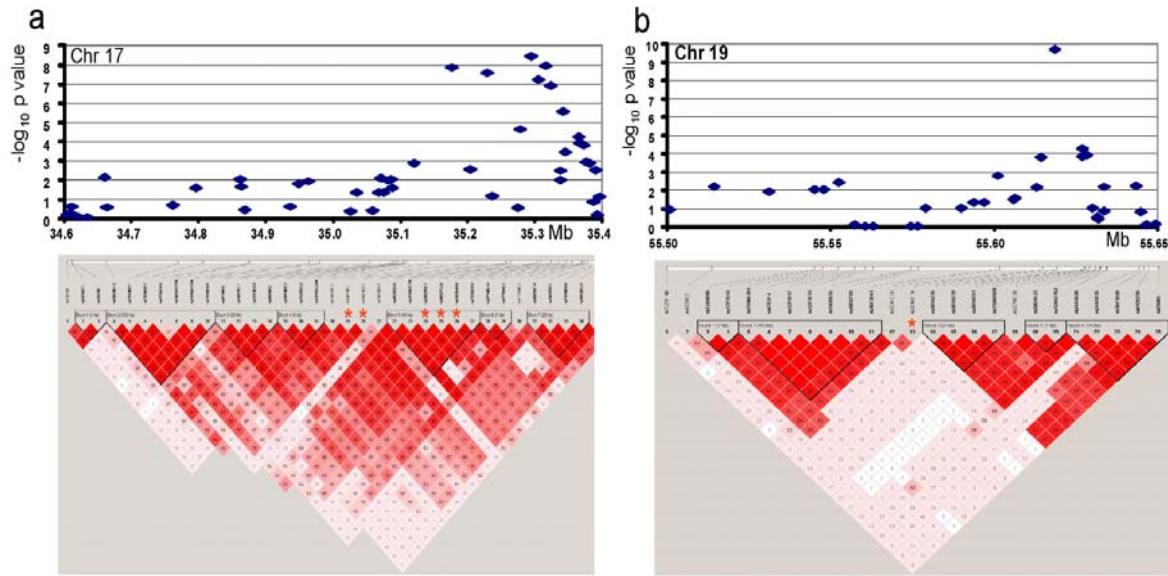

**Supplementary Figure 2.** Haplotype analysis of PBC susceptibility regions on chromosomes 17 and 19. In the top half of panels **a** and **b**, the association results using SNPTTEST analysis is shown. The results include imputed SNPs (see **Supplementary Methods** and **Supplementary Table 6**). SNPTTEST results were adjusted for population substructure using the PCA results from the first three principle components. The SNPTTEST algorithm also adjusts for genotype uncertainty (**Supplementary Methods**). SNPs with  $-\log_{10} p$  values  $> 7$  are indicated with a red star above the haplotype heat plot and include rs907092, rs9303277, rs2872507, rs8067378 and rs2305480 for chromosome 17 and rs3745516 for chromosome 19. In panel **c**, the results for PBC are compared with those for pediatric asthma [derived from Moffatt, M.F. et al. Nature 448, 470-3 (2007)]. The odds ratios are presented for the minor allele on the forward strand and show an opposite direction for the odds ratio for these two diseases.

**Supplementary Table 1. Summary of Subject Genotyping Information**

|                                                | Platform      | Genotyped | Excluded From Analyses  |                           |                          |                      | Analysed Homogeneous |
|------------------------------------------------|---------------|-----------|-------------------------|---------------------------|--------------------------|----------------------|----------------------|
|                                                |               |           | % complete <sup>a</sup> | relationship <sup>b</sup> | nonEuropean <sup>c</sup> | non-Italian European | Italian <sup>d</sup> |
| Italian PBC Cases                              | Illumina 610K | 524       | 15                      | 13                        | 6                        | 37                   | 453                  |
| Italian Controls                               | Illumina 1Mb  | 1027      | 29                      | 16                        | 11                       | 971                  | 637                  |
| British Blood Bank Controls                    | Illumina 550K | 1357      | 19                      | 3                         | 18                       | 1317                 | 6                    |
| New York Cancer Project                        | Illumina 550K | 1425      | 10                      | 10                        | 115                      | 1280                 | 159                  |
| Childrens Hospital of Philadelphia             | Illumina 550K | 1711      | 23                      | 47                        | 169                      | 1472                 | 129                  |
| NIH Laboratory of Neurogenetics                | Illumina 550K | 271       | 271                     | 0                         | 16                       | 255                  | 14                   |
| Total Controls Included in Analyses            |               |           |                         |                           |                          |                      | 945                  |
|                                                |               |           |                         |                           |                          |                      | Canadian/European    |
| Original Canadian PBC Cases <sup>e</sup>       | Illumina 370K | 536       | 6                       | 30                        | 19                       | NA                   | 481                  |
| M.D. Anderson historical controls <sup>e</sup> | Illumina 300K | 1137      | 0                       | 4                         | 15                       | NA                   | 1118                 |
| Canadian subjects <sup>e</sup>                 | Illumina 370K | 399       | 1                       | 4                         | 16                       | NA                   | 378                  |
| Cancer Genetics Markers of Susceptibility      | Illumina 550K | 2236      | 0                       | 12                        | 14                       | NA                   | 2210                 |
| Total Controls Included in Analyses            |               |           |                         |                           |                          |                      | 3706                 |

a. Less than 95% complete genotypes and sex discrepancy

b.  $P^{\wedge} > 0.1$  assessed using PLINK IBD

c. >10% nonEuropean admixture (see Supplemental Methods)

d. Based on PCA analyses (see Supplemental Methods and Supplemental Figure 1).

e. Genotypes used in original Canadian study.

Supplementary Table 2. Summary of Association Tests for Italian PBC and combined Italian PBC and Canadian PBC study<sup>a</sup>

| SNP                     | Chr. | Position  | Allele 1 | Allele 2 | Gene(s)          | Italian Control Allele Frequency | Italian Case Allele Frequency | Italian p value | Italian Odds Ratio | Italian OR 95% Upper CI | Italian OR 95% Lower CI | Canadian Control Allele Frequency | Canadian Case Allele Frequency | Canadian p value | Canadian Odds Ratio | Canadian OR 95% Upper CI | Canadian OR 95% Lower CI | Meta-Analysis p value | Meta-Analysis Odds Ratio | Cochran's Q Statistic p value |
|-------------------------|------|-----------|----------|----------|------------------|----------------------------------|-------------------------------|-----------------|--------------------|-------------------------|-------------------------|-----------------------------------|--------------------------------|------------------|---------------------|--------------------------|--------------------------|-----------------------|--------------------------|-------------------------------|
| rs3748816               | 1    | 2516606   | G        | A        | <i>MMEL1</i>     | 0.305                            | 0.305                         | 9.14E-01        | 1.01               | 0.85                    | 1.21                    | 0.337                             | 0.400                          | 7.13E-05         | 1.32                | 1.15                     | 1.51                     | 1.90E-03              | 1.19                     | 0.022                         |
| rs11588497              | 1    | 32803048  | G        | A        | <i>ZBTB8A</i>    | 0.193                            | 0.175                         | 2.99E-01        | 0.89               | 0.72                    | 1.11                    | 0.190                             | 0.140                          | 4.68E-05         | 0.67                | 0.55                     | 0.81                     | 4.29E-04              | 0.77                     | 0.069                         |
| rs3790565               | 1    | 67583944  | C        | T        | <i>IL12RB2</i>   | 0.227                            | 0.272                         | 1.74E-02        | 1.26               | 1.04                    | 1.51                    | 0.174                             | 0.256                          | 6.44E-09         | 1.60                | 1.37                     | 1.88                     | 4.46E-09              | 1.44                     | 0.065                         |
| rs3790567               | 1    | 67594965  | A        | G        | <i>IL12RB2</i>   | 0.311                            | 0.376                         | 1.46E-03        | 1.32               | 1.11                    | 1.57                    | 0.232                             | 0.331                          | 4.40E-10         | 1.60                | 1.38                     | 1.86                     | 7.53E-12              | 1.48                     | 0.093                         |
| rs4297265               | 1    | 67624923  | G        | A        | <i>IL12RB2</i>   | 0.486                            | 0.521                         | 9.57E-02        | 1.15               | 0.98                    | 1.35                    | 0.410                             | 0.479                          | 1.37E-04         | 1.31                | 1.14                     | 1.50                     | 5.42E-05              | 1.24                     | 0.232                         |
| rs2270614               | 1    | 67628609  | A        | G        | <i>IL12RB2</i>   | 0.486                            | 0.521                         | 9.38E-02        | 1.15               | 0.98                    | 1.35                    | 0.410                             | 0.481                          | 8.10E-05         | 1.32                | 1.15                     | 1.51                     | 3.44E-05              | 1.25                     | 0.206                         |
| rs1418426               | 1    | 111299634 | C        | T        | <i>C1orf103</i>  | 0.405                            | 0.389                         | 2.92E-01        | 0.91               | 0.77                    | 1.08                    | 0.384                             | 0.317                          | 1.09E-05         | 0.72                | 0.62                     | 0.83                     | 1.01E-04              | 0.80                     | 0.047                         |
| rs4636400               | 1    | 144155913 | G        | T        | <i>NBPF3</i>     | 0.351                            | 0.295                         | 8.18E-03        | 0.79               | 0.66                    | 0.94                    | 0.397                             | 0.347                          | 4.23E-03         | 0.82                | 0.71                     | 0.94                     | 8.08E-05              | 0.80                     | 0.837                         |
| rs1539414               | 1    | 196010129 | A        | G        | <i>DENND1B</i>   | 0.251                            | 0.300                         | 4.16E-03        | 1.30               | 1.09                    | 1.56                    | 0.219                             | 0.255                          | 7.91E-03         | 1.23                | 1.06                     | 1.44                     | 1.82E-04              | 1.25                     | 0.581                         |
| rs3024505               | 1    | 205006527 | A        | G        | <i>MAPKAPK2</i>  | 0.141                            | 0.150                         | 4.74E-01        | 1.09               | 0.86                    | 1.37                    | 0.151                             | 0.202                          | 3.85E-05         | 1.43                | 1.21                     | 1.70                     | 1.54E-04              | 1.30                     | 0.055                         |
| rs7527314               | 1    | 215886180 | T        | C        | <i>SPATA17</i>   | 0.211                            | 0.278                         | 5.09E-05        | 1.48               | 1.22                    | 1.78                    | 0.225                             | 0.245                          | 1.45E-01         | 1.12                | 0.96                     | 1.31                     | 2.21E-04              | 1.26                     | 0.029                         |
| rs3795366               | 1    | 230717373 | A        | G        | <i>SIPA1L2</i>   | 0.042                            | 0.077                         | 5.21E-05        | 2.03               | 1.43                    | 2.87                    | 0.069                             | 0.066                          | 6.91E-01         | 0.95                | 0.72                     | 1.24                     | 3.46E-02              | 1.26                     | 0.001                         |
| rs789633                | 1    | 230739777 | C        | T        | <i>SIPA1L2</i>   | 0.040                            | 0.072                         | 9.81E-05        | 2.01               | 1.41                    | 2.86                    | 0.069                             | 0.067                          | 8.64E-01         | 0.98                | 0.75                     | 1.28                     | 2.98E-02              | 1.27                     | 0.002                         |
| rs789645                | 1    | 230748744 | G        | A        | <i>SIPA1L2</i>   | 0.038                            | 0.073                         | 4.85E-05        | 2.05               | 1.44                    | 2.93                    | 0.059                             | 0.064                          | 5.30E-01         | 1.09                | 0.83                     | 1.43                     | 2.86E-03              | 1.40                     | 0.007                         |
| rs12049318              | 1    | 241660283 | A        | C        | <i>SDCCAG8</i>   | 0.152                            | 0.143                         | 4.63E-01        | 0.92               | 0.73                    | 1.16                    | 0.170                             | 0.117                          | 5.94E-05         | 0.65                | 0.53                     | 0.80                     | 4.66E-04              | 0.76                     | 0.031                         |
| rs7576701               | 2    | 3696102   | C        | T        | <i>ALLC</i>      | 0.208                            | 0.275                         | 9.93E-05        | 1.45               | 1.20                    | 1.75                    | 0.219                             | 0.234                          | 2.98E-01         | 1.09                | 0.93                     | 1.28                     | 1.14E-03              | 1.23                     | 0.021                         |
| rs1406230               | 2    | 29436825  | T        | C        | <i>ALK</i>       | 0.327                            | 0.409                         | 8.67E-06        | 1.46               | 1.24                    | 1.73                    | 0.376                             | 0.363                          | 5.00E-01         | 0.95                | 0.83                     | 1.10                     | 1.55E-02              | 1.14                     | 0.000                         |
| rs7569076               | 2    | 88554147  | T        | C        | <i>none</i>      | 0.261                            | 0.301                         | 3.53E-02        | 1.22               | 1.01                    | 1.46                    | 0.214                             | 0.274                          | 2.11E-04         | 1.34                | 1.15                     | 1.56                     | 1.41E-05              | 1.30                     | 0.355                         |
| rs2890845               | 2    | 146810855 | C        | A        | <i>none</i>      | 0.493                            | 0.491                         | 8.96E-01        | 0.99               | 0.84                    | 1.16                    | 0.453                             | 0.384                          | 5.93E-05         | 0.75                | 0.66                     | 0.86                     | 1.66E-03              | 0.84                     | 0.012                         |
| rs799770                | 2    | 154999825 | G        | A        | <i>GALNT13</i>   | 0.093                            | 0.152                         | 1.08E-05        | 1.73               | 1.35                    | 2.21                    | 0.122                             | 0.118                          | 5.92E-01         | 0.94                | 0.76                     | 1.17                     | 1.12E-02              | 1.23                     | 0.000                         |
| rs697651                | 2    | 155031524 | C        | A        | <i>GALNT13</i>   | 0.360                            | 0.279                         | 2.93E-05        | 0.68               | 0.57                    | 0.82                    | 0.350                             | 0.353                          | 8.17E-01         | 1.02                | 0.88                     | 1.17                     | 1.21E-02              | 0.87                     | 0.001                         |
| rs3769811               | 2    | 182745334 | T        | G        | <i>PDE1A</i>     | 0.181                            | 0.155                         | 5.61E-02        | 0.81               | 0.65                    | 1.01                    | 0.188                             | 0.138                          | 3.52E-04         | 0.70                | 0.58                     | 0.85                     | 8.75E-05              | 0.75                     | 0.365                         |
| rs7601754               | 2    | 191648696 | G        | A        | <i>STAT4</i>     | 0.238                            | 0.190                         | 3.92E-03        | 0.74               | 0.61                    | 0.91                    | 0.174                             | 0.134                          | 7.91E-04         | 0.71                | 0.58                     | 0.87                     | 1.34E-05              | 0.73                     | 0.841                         |
| rs6752770               | 2    | 191681808 | G        | A        | <i>STAT4</i>     | 0.269                            | 0.325                         | 2.15E-03        | 1.32               | 1.11                    | 1.58                    | 0.294                             | 0.334                          | 6.97E-03         | 1.22                | 1.06                     | 1.40                     | 6.15E-05              | 1.26                     | 0.483                         |
| rs10515940              | 2    | 201266944 | A        | C        | <i>CASP10</i>    | 0.097                            | 0.143                         | 8.85E-05        | 1.63               | 1.27                    | 2.08                    | 0.146                             | 0.136                          | 5.79E-01         | 0.95                | 0.78                     | 1.15                     | 4.68E-02              | 1.17                     | 0.001                         |
| rs1530239               | 2    | 213651879 | T        | C        | <i>IKZF2</i>     | 0.110                            | 0.058                         | 3.14E-05        | 0.51               | 0.37                    | 0.71                    | 0.088                             | 0.089                          | 8.01E-01         | 1.03                | 0.81                     | 1.31                     | 2.38E-02              | 0.80                     | 0.001                         |
| rs6437268               | 2    | 240649535 | C        | T        | <i>none</i>      | 0.365                            | 0.296                         | 4.15E-04        | 0.73               | 0.61                    | 0.87                    | 0.339                             | 0.299                          | 1.06E-02         | 0.83                | 0.71                     | 0.96                     | 2.09E-05              | 0.78                     | 0.298                         |
| rs2887401               | 2    | 240685626 | A        | G        | <i>none</i>      | 0.265                            | 0.211                         | 3.02E-03        | 0.74               | 0.61                    | 0.91                    | 0.258                             | 0.220                          | 1.23E-02         | 0.81                | 0.69                     | 0.96                     | 9.63E-05              | 0.78                     | 0.542                         |
| rs4685976               | 3    | 5716702   | C        | T        | <i>none</i>      | 0.390                            | 0.376                         | 7.10E-01        | 0.97               | 0.82                    | 1.15                    | 0.442                             | 0.490                          | 2.27E-05         | 1.34                | 1.17                     | 1.54                     | 2.56E-03              | 1.18                     | 0.004                         |
| rs1869241               | 3    | 5729732   | T        | C        | <i>none</i>      | 0.269                            | 0.259                         | 7.21E-01        | 0.97               | 0.80                    | 1.16                    | 0.311                             | 0.381                          | 7.09E-06         | 1.38                | 1.20                     | 1.58                     | 1.01E-03              | 1.21                     | 0.003                         |
| rs9311642               | 3    | 5748145   | C        | T        | <i>none</i>      | 0.372                            | 0.382                         | 4.63E-01        | 1.07               | 0.90                    | 1.26                    | 0.396                             | 0.459                          | 8.79E-05         | 1.31                | 1.15                     | 1.50                     | 5.04E-04              | 1.21                     | 0.062                         |
| rs4686174               | 3    | 7894746   | T        | C        | <i>none</i>      | 0.254                            | 0.303                         | 6.33E-03        | 1.29               | 1.07                    | 1.54                    | 0.267                             | 0.307                          | 6.47E-03         | 1.23                | 1.06                     | 1.42                     | 9.96E-05              | 1.25                     | 0.724                         |
| rs6797331               | 3    | 7915671   | T        | C        | <i>none</i>      | 0.258                            | 0.307                         | 4.97E-03        | 1.30               | 1.08                    | 1.55                    | 0.270                             | 0.313                          | 3.71E-03         | 1.24                | 1.07                     | 1.44                     | 4.62E-05              | 1.27                     | 0.761                         |
| rs1348109               | 3    | 16924518  | G        | A        | <i>PLCL2</i>     | 0.419                            | 0.436                         | 3.88E-01        | 1.08               | 0.91                    | 1.27                    | 0.436                             | 0.494                          | 4.18E-05         | 1.33                | 1.16                     | 1.52                     | 2.08E-04              | 1.22                     | 0.052                         |
| rs1372072               | 3    | 16930263  | A        | G        | <i>PLCL2</i>     | 0.336                            | 0.357                         | 2.92E-01        | 1.10               | 0.92                    | 1.30                    | 0.350                             | 0.428                          | 2.70E-06         | 1.39                | 1.21                     | 1.60                     | 1.52E-05              | 1.27                     | 0.033                         |
| rs9876137               | 3    | 16936269  | G        | A        | <i>PLCL2</i>     | 0.337                            | 0.358                         | 2.90E-01        | 1.10               | 0.92                    | 1.30                    | 0.350                             | 0.428                          | 2.64E-06         | 1.39                | 1.21                     | 1.60                     | 1.42E-05              | 1.27                     | 0.033                         |
| rs1025818               | 3    | 16940025  | C        | T        | <i>PLCL2</i>     | 0.334                            | 0.359                         | 3.00E-01        | 1.09               | 0.92                    | 1.30                    | 0.330                             | 0.409                          | 1.28E-06         | 1.41                | 1.23                     | 1.62                     | 9.49E-06              | 1.28                     | 0.023                         |
| rs4618210               | 3    | 17099388  | G        | A        | <i>PLCL2</i>     | 0.467                            | 0.490                         | 3.34E-02        | 1.20               | 1.01                    | 1.41                    | 0.468                             | 0.473                          | 8.60E-04         | 1.26                | 1.10                     | 1.45                     | 3.78E-05              | 1.25                     | 0.513                         |
| rs1158265               | 3    | 24311166  | C        | T        | <i>THRB</i>      | 0.274                            | 0.275                         | 7.04E-01        | 1.04               | 0.86                    | 1.24                    | 0.306                             | 0.244                          | 9.54E-05         | 0.73                | 0.63                     | 0.86                     | 8.57E-03              | 0.85                     | 0.006                         |
| rs11394761              | 3    | 24390831  | A        | C        | <i>THRB</i>      | 0.293                            | 0.236                         | 4.76E-03        | 0.76               | 0.63                    | 0.92                    | 0.363                             | 0.312                          | 4.30E-03         | 0.81                | 0.70                     | 0.94                     | 7.56E-05              | 0.79                     | 0.626                         |
| rs4683017               | 3    | 45009415  | C        | T        | <i>EXOSC7</i>    | 0.453                            | 0.452                         | 9.26E-01        | 0.99               | 0.84                    | 1.17                    | 0.470                             | 0.401                          | 4.42E-05         | 0.75                | 0.65                     | 0.86                     | 1.95E-03              | 0.85                     | 0.013                         |
| rs11130040              | 3    | 45024190  | A        | G        | <i>EXOSC7</i>    | 0.465                            | 0.461                         | 7.90E-01        | 0.98               | 0.83                    | 1.15                    | 0.487                             | 0.419                          | 6.89E-05         | 0.76                | 0.66                     | 0.87                     | 1.67E-03              | 0.84                     | 0.022                         |
| rs1404100               | 3    | 100273457 | A        | G        | <i>Hs.581579</i> | 0.218                            | 0.219                         | 8.83E-01        | 1.02               | 0.83                    | 1.24                    | 0.199                             | 0.259                          | 2.96E-05         | 1.40                | 1.19                     | 1.63                     | 6.95E-04              | 1.24                     | 0.012                         |
| rs13078855              | 3    | 120589967 | T        | C        | <i>CDGAP</i>     | 0.200                            | 0.150                         | 3.15E-03        | 0.72               | 0.58                    | 0.90                    | 0.180                             | 0.138                          | 1.63E-03         | 0.73                | 0.60                     | 0.89                     | 9.50E-06              | 0.72                     | 0.989                         |
| rs12494314 <sup>b</sup> | 3    | 120605510 | C        | T        | <i>CDGAP</i>     | 0.211                            | 0.138                         | 1.86E-05        | 0.62               | 0.49                    | 0.77                    | 0.176                             | 0.135                          | 2.94E-03         | 0.75                | 0.61                     | 0.90                     | 1.59E-07              | 0.67                     | 0.112                         |
| rs1132200               | 3    | 120633526 | T        | C        | <i>TMEM39A</i>   | 0.197                            | 0.125                         | 1.27E-05        | 0.60               | 0.47                    | 0.76                    | 0.159                             | 0.122                          | 5.03E-03         | 0.75                | 0.61                     | 0.92                     | 3.87E-07              | 0.67                     | 0.192                         |
| rs7650774 <sup>b</sup>  | 3    | 120687740 | C        | T        | <i>KTELC1</i>    | 0.211                            | 0.138                         | 1.90E-05        | 0.62               | 0.49                    | 0.77                    | 0.175                             | 0.134                          | 2.64E-03         | 0.74                | 0.61                     | 0.90                     | 1.32E-07              | 0.67                     | 0.116                         |
| rs2293370               | 3    | 120702624 | A        | G        | <i>C3orf1</i>    | 0.216                            | 0.145                         | 3.30E-05        | 0.63               | 0.51                    | 0.78                    | 0.182                             | 0.140                          | 2.28E-03         | 0.74                | 0.61                     | 0.90                     | 3.03E-07              | 0.68                     | 0.320                         |
| rs6804441               | 3    | 120743634 | G        | A        | <i>CD80</i>      | 0.194                            | 0.139                         | 9.37E-04        | 0.69               | 0.55                    | 0.86                    | 0.170                             | 0.138                          | 1.55E-02         | 0.79                | 0.65                     | 0.96                     | 4.48E-05              | 0.74                     | 0.413                         |
| rs979903                | 3    | 136776944 | C        | T        | <i>none</i>      | 0.244                            | 0.317                         | 9.21E-05        | 1.43               | 1.20                    | 1.71                    | 0.308                             | 0.312                          | 7.19E-01         | 1.03                | 0.89                     | 1.19                     | 1.09E-02              | 1.16                     | 0.003                         |
| rs11917011              | 3    | 155711698 | T        | C        | <i>none</i>      | 0.083                            | 0.072                         | 1.98E-01        | 0.82               | 0.60                    | 1.12                    | 0.065                             | 0.031                          | 6.21E-05         | 0.86                | 0.31                     | 0.67                     | 3.69E-04              | 0.64                     | 0.018                         |
| rs4680514               | 3    | 160944150 | A        | G        | <i>SCHIP1</i>    | 0.187                            | 0.161                         | 8.21E-02        | 0.82               | 0.66                    | 1.03                    | 0.236                             | 0.180                          | 1.54E-04         | 0.71                | 0.60                     | 0.85                     | 7.94E-05              | 0.76                     | 0.370                         |
| rs1461100               | 3    | 160945597 | A        | G        | <i>SCHIP1</i>    | 0.178                            | 0.150                         | 4.87E-02        | 0.80               | 0.63                    | 1.00                    | 0.227                             | 0.175                          | 3.29E-04         | 0.72                | 0.61                     | 0.86                     | 7.28E-05              | 0.76                     | 0.562                         |

|            |   |           |   |   |           |       |       |          |      |      |      |       |       |          |      |      |      |          |      |       |
|------------|---|-----------|---|---|-----------|-------|-------|----------|------|------|------|-------|-------|----------|------|------|------|----------|------|-------|
| rs924247   | 3 | 160963022 | C | T | SCHIP1    | 0.469 | 0.399 | 4.08E-03 | 0.78 | 0.66 | 0.93 | 0.547 | 0.517 | 8.08E-04 | 0.79 | 0.91 | 0.69 | 1.17E-05 | 0.79 | 0.912 |
| rs3863075  | 3 | 160985457 | C | T | SCHIP1    | 0.281 | 0.224 | 5.34E-03 | 0.76 | 0.63 | 0.92 | 0.353 | 0.288 | 2.08E-04 | 0.76 | 0.66 | 0.88 | 3.05E-06 | 0.76 | 0.916 |
| rs7636819  | 3 | 160988297 | G | T | SCHIP1    | 0.280 | 0.222 | 5.35E-03 | 0.76 | 0.63 | 0.92 | 0.353 | 0.290 | 2.98E-04 | 0.76 | 0.66 | 0.88 | 4.31E-06 | 0.76 | 0.965 |
| rs6441276  | 3 | 161034716 | G | A | SCHIP1    | 0.190 | 0.156 | 7.01E-02 | 0.82 | 0.66 | 1.02 | 0.250 | 0.185 | 3.71E-05 | 0.70 | 0.59 | 0.83 | 1.16E-05 | 0.74 | 0.256 |
| rs26298    | 3 | 161093985 | T | C | SCHIP1    | 0.345 | 0.299 | 1.84E-02 | 0.81 | 0.68 | 0.96 | 0.436 | 0.359 | 3.43E-05 | 0.75 | 0.65 | 0.86 | 1.65E-06 | 0.76 | 0.413 |
| rs17811014 | 3 | 161170723 | T | C | none      | 0.173 | 0.199 | 1.20E-01 | 1.18 | 0.96 | 1.46 | 0.158 | 0.213 | 5.44E-05 | 1.41 | 1.20 | 1.67 | 2.32E-05 | 1.33 | 0.161 |
| rs2243123  | 3 | 161192345 | C | T | IL12A     | 0.239 | 0.181 | 9.44E-05 | 0.66 | 0.54 | 0.82 | 0.285 | 0.230 | 7.31E-04 | 0.76 | 0.65 | 0.89 | 4.57E-07 | 0.72 | 0.305 |
| rs583911   | 3 | 161193084 | G | A | IL12A     | 0.471 | 0.534 | 9.29E-04 | 1.32 | 1.12 | 1.56 | 0.441 | 0.488 | 2.93E-05 | 1.34 | 1.17 | 1.53 | 1.41E-07 | 1.32 | 0.961 |
| rs6441284  | 3 | 161200962 | G | A | IL12A     | 0.369 | 0.294 | 1.97E-05 | 0.68 | 0.57 | 0.81 | 0.393 | 0.339 | 2.08E-03 | 0.80 | 0.69 | 0.92 | 2.91E-07 | 0.75 | 0.185 |
| rs485497   | 3 | 161201826 | G | A | IL12A     | 0.439 | 0.392 | 9.07E-03 | 0.80 | 0.68 | 0.95 | 0.498 | 0.431 | 7.54E-05 | 0.76 | 0.66 | 0.87 | 3.15E-06 | 0.78 | 0.657 |
| rs6441286  | 3 | 161211572 | G | T | IL12A     | 0.444 | 0.487 | 1.25E-04 | 1.38 | 1.17 | 1.63 | 0.394 | 0.495 | 1.35E-08 | 1.48 | 1.30 | 1.70 | 7.63E-12 | 1.44 | 0.492 |
| rs574808   | 3 | 161215677 | C | T | IL12A     | 0.340 | 0.277 | 2.85E-04 | 0.72 | 0.60 | 0.86 | 0.421 | 0.328 | 2.19E-07 | 0.68 | 0.59 | 0.79 | 3.30E-10 | 0.70 | 0.706 |
| rs10513549 | 3 | 161237201 | A | G | IL12A     | 0.228 | 0.184 | 2.36E-03 | 0.73 | 0.59 | 0.89 | 0.277 | 0.230 | 4.70E-03 | 0.79 | 0.68 | 0.93 | 5.93E-05 | 0.77 | 0.468 |
| rs1075498  | 3 | 161239145 | A | G | IL12A     | 0.277 | 0.203 | 7.21E-06 | 0.64 | 0.52 | 0.78 | 0.290 | 0.235 | 6.43E-04 | 0.76 | 0.65 | 0.89 | 6.54E-08 | 0.71 | 0.158 |
| rs6762377  | 3 | 161323322 | A | G | none      | 0.078 | 0.069 | 4.25E-01 | 0.88 | 0.64 | 1.21 | 0.131 | 0.081 | 3.89E-05 | 0.60 | 0.47 | 0.77 | 2.01E-04 | 0.69 | 0.060 |
| rs4679904  | 3 | 161823590 | T | C | ARF7      | 0.219 | 0.210 | 7.31E-01 | 0.97 | 0.79 | 1.18 | 0.289 | 0.204 | 2.67E-07 | 0.65 | 0.55 | 0.76 | 5.31E-05 | 0.77 | 0.003 |
| rs4434248  | 4 | 18514674  | G | A | none      | 0.423 | 0.345 | 4.83E-05 | 0.70 | 0.59 | 0.83 | 0.370 | 0.375 | 8.78E-01 | 1.01 | 0.88 | 1.16 | 1.24E-02 | 0.87 | 0.001 |
| rs1452554  | 4 | 18529262  | T | C | none      | 0.442 | 0.363 | 2.33E-05 | 0.70 | 0.59 | 0.82 | 0.395 | 0.401 | 8.58E-01 | 1.01 | 0.88 | 1.16 | 9.61E-03 | 0.87 | 0.001 |
| rs7678820  | 4 | 22901080  | C | T | none      | 0.167 | 0.142 | 1.34E-01 | 0.84 | 0.67 | 1.06 | 0.181 | 0.121 | 8.06E-06 | 0.63 | 0.51 | 0.77 | 1.33E-05 | 0.71 | 0.057 |
| rs1912031  | 4 | 22938137  | A | G | none      | 0.175 | 0.140 | 2.67E-02 | 0.77 | 0.62 | 0.97 | 0.184 | 0.141 | 1.48E-03 | 0.74 | 0.61 | 0.89 | 8.31E-05 | 0.74 | 0.657 |
| rs4692196  | 4 | 26949002  | C | T | none      | 0.070 | 0.063 | 5.13E-01 | 0.90 | 0.65 | 1.24 | 0.071 | 0.105 | 9.79E-05 | 1.57 | 1.25 | 1.96 | 7.73E-03 | 1.29 | 0.008 |
| rs2903896  | 4 | 83892809  | T | C | SCD5      | 0.198 | 0.268 | 8.68E-05 | 1.47 | 1.21 | 1.77 | 0.177 | 0.173 | 6.41E-01 | 0.96 | 0.80 | 1.15 | 1.36E-02 | 1.18 | 0.002 |
| rs2869442  | 4 | 87640302  | A | G | MAPK10    | 0.058 | 0.060 | 8.10E-01 | 1.04 | 0.74 | 1.47 | 0.051 | 0.083 | 5.22E-05 | 1.69 | 1.31 | 2.19 | 5.36E-04 | 1.43 | 0.023 |
| rs10516775 | 4 | 87840497  | C | T | PTPN13    | 0.056 | 0.054 | 9.09E-01 | 0.98 | 0.69 | 1.40 | 0.048 | 0.078 | 9.90E-05 | 1.68 | 1.30 | 2.19 | 1.67E-03 | 1.40 | 0.015 |
| rs7665090  | 4 | 103770651 | A | G | MANBA     | 0.491 | 0.448 | 1.45E-03 | 0.77 | 0.65 | 0.90 | 0.496 | 0.444 | 3.75E-03 | 0.82 | 0.71 | 0.94 | 3.47E-05 | 0.80 | 0.488 |
| rs2866413  | 4 | 103776125 | G | A | MANBA     | 0.490 | 0.450 | 1.78E-03 | 0.77 | 0.65 | 0.91 | 0.496 | 0.444 | 3.83E-03 | 0.82 | 0.71 | 0.94 | 4.11E-05 | 0.80 | 0.518 |
| rs228611   | 4 | 103780757 | A | G | MANBA     | 0.489 | 0.434 | 4.18E-03 | 0.79 | 0.67 | 0.93 | 0.482 | 0.428 | 2.52E-03 | 0.81 | 0.67 | 0.93 | 5.44E-05 | 0.81 | 0.709 |
| rs228614   | 4 | 103797685 | A | G | MANBA     | 0.496 | 0.438 | 2.31E-03 | 0.77 | 0.66 | 0.91 | 0.487 | 0.430 | 1.57E-03 | 0.80 | 0.70 | 0.92 | 2.19E-05 | 0.80 | 0.667 |
| rs223420   | 4 | 103947120 | A | C | UBE2D3P   | 0.465 | 0.529 | 7.94E-04 | 1.32 | 1.12 | 1.56 | 0.474 | 0.480 | 1.40E-02 | 1.19 | 1.04 | 1.36 | 7.66E-05 | 1.23 | 0.278 |
| rs4698874  | 4 | 104149960 | C | T | NHEDC1    | 0.458 | 0.480 | 1.05E-03 | 1.32 | 1.12 | 1.55 | 0.475 | 0.470 | 1.02E-02 | 1.19 | 1.04 | 1.37 | 5.83E-05 | 1.24 | 0.353 |
| rs10516496 | 4 | 104161614 | T | C | NHEDC2    | 0.341 | 0.391 | 3.27E-03 | 1.29 | 1.09 | 1.53 | 0.332 | 0.381 | 6.59E-03 | 1.21 | 1.06 | 1.39 | 8.98E-05 | 1.24 | 0.572 |
| rs11946020 | 4 | 104164191 | C | T | NHEDC2    | 0.343 | 0.394 | 2.96E-03 | 1.29 | 1.09 | 1.53 | 0.333 | 0.381 | 7.21E-03 | 1.21 | 1.05 | 1.39 | 8.47E-05 | 1.24 | 0.553 |
| rs1358229  | 4 | 123116184 | T | C | TRPC3     | 0.482 | 0.483 | 8.23E-02 | 1.16 | 0.98 | 1.36 | 0.445 | 0.398 | 1.17E-05 | 1.36 | 1.18 | 1.55 | 6.24E-06 | 1.27 | 0.140 |
| rs6838639  | 4 | 123118615 | A | G | TRPC3     | 0.250 | 0.224 | 1.13E-01 | 0.85 | 0.70 | 1.04 | 0.259 | 0.190 | 3.65E-06 | 0.67 | 0.56 | 0.79 | 6.63E-06 | 0.74 | 0.068 |
| rs13144383 | 4 | 139310254 | G | A | SLC7A11   | 0.148 | 0.190 | 5.92E-03 | 1.35 | 1.09 | 1.68 | 0.160 | 0.196 | 2.04E-03 | 1.32 | 1.11 | 1.57 | 6.21E-05 | 1.32 | 0.748 |
| rs2291713  | 4 | 141764847 | C | A | TBC1D9    | 0.139 | 0.134 | 4.77E-01 | 0.92 | 0.72 | 1.16 | 0.135 | 0.189 | 1.74E-05 | 1.48 | 1.24 | 1.76 | 2.66E-03 | 1.24 | 0.002 |
| rs931283   | 5 | 2440550   | T | C | none      | 0.447 | 0.459 | 2.68E-01 | 1.10 | 0.93 | 1.29 | 0.485 | 0.409 | 5.23E-05 | 0.75 | 0.65 | 0.86 | 1.44E-02 | 0.88 | 0.000 |
| rs2923764  | 5 | 18216677  | G | A | ARSL      | 0.496 | 0.424 | 7.14E-05 | 0.72 | 0.61 | 0.84 | 0.436 | 0.425 | 4.10E-01 | 0.94 | 0.82 | 1.08 | 2.73E-03 | 0.85 | 0.008 |
| rs4576132  | 5 | 158916817 | A | G | none      | 0.403 | 0.398 | 7.70E-01 | 0.98 | 0.83 | 1.15 | 0.341 | 0.406 | 9.68E-05 | 1.32 | 1.15 | 1.51 | 5.65E-03 | 1.16 | 0.007 |
| rs12206548 | 6 | 451231    | G | A | EXOSC2    | 0.402 | 0.401 | 9.32E-01 | 1.01 | 0.85 | 1.19 | 0.413 | 0.347 | 7.40E-05 | 0.75 | 0.65 | 0.87 | 3.97E-03 | 0.85 | 0.010 |
| rs9392056  | 6 | 463078    | G | A | EXOSC2    | 0.395 | 0.397 | 8.14E-01 | 1.02 | 0.86 | 1.21 | 0.389 | 0.318 | 2.19E-05 | 0.73 | 0.63 | 0.85 | 2.96E-03 | 0.85 | 0.004 |
| rs6918152  | 6 | 487159    | A | G | EXOSC2    | 0.395 | 0.393 | 9.75E-01 | 1.00 | 0.84 | 1.18 | 0.388 | 0.317 | 1.58E-05 | 0.73 | 0.63 | 0.84 | 1.34E-03 | 0.84 | 0.006 |
| rs9885921  | 6 | 14240590  | G | A | CD83      | 0.427 | 0.410 | 3.88E-01 | 0.93 | 0.79 | 1.10 | 0.510 | 0.577 | 4.22E-05 | 1.33 | 1.52 | 1.16 | 1.29E-02 | 1.14 | 0.002 |
| rs2244839  | 6 | 31546347  | A | G | Hs.615398 | 0.369 | 0.366 | 5.07E-01 | 0.94 | 0.80 | 1.12 | 0.255 | 0.328 | 5.34E-05 | 1.35 | 1.17 | 1.57 | 5.42E-03 | 1.17 | 0.001 |
| rs1055569  | 6 | 31548061  | T | C | Hs.615398 | 0.457 | 0.474 | 6.34E-01 | 1.04 | 0.88 | 1.23 | 0.327 | 0.408 | 1.68E-05 | 1.36 | 1.18 | 1.57 | 1.89E-04 | 1.22 | 0.011 |
| rs2516440  | 6 | 31548476  | A | G | Hs.615398 | 0.460 | 0.477 | 6.45E-01 | 1.04 | 0.88 | 1.22 | 0.332 | 0.410 | 3.87E-05 | 1.34 | 1.17 | 1.54 | 3.42E-04 | 1.21 | 0.015 |
| rs2395488  | 6 | 31553888  | G | A | none      | 0.351 | 0.369 | 5.33E-01 | 1.06 | 0.89 | 1.25 | 0.342 | 0.412 | 1.95E-05 | 1.35 | 1.18 | 1.54 | 9.35E-05 | 1.24 | 0.018 |
| rs2523647  | 6 | 31557757  | G | A | Hs.692412 | 0.276 | 0.304 | 2.26E-01 | 1.12 | 0.93 | 1.34 | 0.218 | 0.280 | 4.86E-05 | 1.37 | 1.18 | 1.60 | 3.72E-05 | 1.28 | 0.054 |
| rs2269475  | 6 | 31691910  | T | C | AIF1      | 0.072 | 0.107 | 3.92E-04 | 1.65 | 1.25 | 2.19 | 0.122 | 0.160 | 1.58E-04 | 1.43 | 1.19 | 1.73 | 5.56E-07 | 1.49 | 0.382 |
| rs1046089  | 6 | 31710946  | A | G | BAT2      | 0.271 | 0.339 | 8.52E-05 | 1.42 | 1.19 | 1.70 | 0.338 | 0.382 | 1.82E-03 | 1.25 | 1.09 | 1.43 | 3.13E-06 | 1.30 | 0.197 |
| rs805303   | 6 | 31724345  | A | G | BAT3      | 0.318 | 0.379 | 5.99E-04 | 1.35 | 1.14 | 1.60 | 0.364 | 0.407 | 7.73E-03 | 1.21 | 1.05 | 1.38 | 4.81E-05 | 1.25 | 0.267 |
| rs3130617  | 6 | 31735502  | C | T | C6orf47   | 0.182 | 0.138 | 4.11E-03 | 0.72 | 0.57 | 0.90 | 0.260 | 0.208 | 2.14E-03 | 0.77 | 0.65 | 0.91 | 2.76E-05 | 0.75 | 0.624 |
| rs2280800  | 6 | 31754377  | A | C | LY6G5C    | 0.076 | 0.114 | 2.26E-04 | 1.66 | 1.27 | 2.18 | 0.123 | 0.163 | 1.17E-04 | 1.44 | 1.20 | 1.74 | 2.52E-07 | 1.50 | 0.373 |
| rs805274   | 6 | 31773173  | C | T | BAT5      | 0.272 | 0.340 | 9.67E-05 | 1.42 | 1.19 | 1.69 | 0.258 | 0.305 | 3.67E-03 | 1.24 | 1.07 | 1.44 | 4.03E-06 | 1.31 | 0.237 |
| rs2242653  | 6 | 31783744  | A | G | C6orf21   | 0.098 | 0.150 | 1.71E-05 | 1.69 | 1.33 | 2.16 | 0.141 | 0.181 | 2.19E-04 | 1.40 | 1.17 | 1.68 | 6.41E-08 | 1.49 | 0.197 |
| rs480092   | 6 | 31872878  | C | T | HSP70     | 0.145 | 0.200 | 4.95E-05 | 1.54 | 1.25 | 1.91 | 0.162 | 0.178 | 1.15E-01 | 1.16 | 0.97 | 1.38 | 2.13E-04 | 1.29 | 0.032 |
| rs2227956  | 6 | 31886251  | G | A | HSPA1L    | 0.094 | 0.072 | 6.40E-02 | 0.75 | 0.56 | 1.02 | 0.182 | 0.126 | 8.52E-05 | 0.67 | 0.54 | 0.82 | 2.47E-05 | 0.70 | 0.544 |
| rs2763979  | 6 | 31902571  | T | C | HSPA1B    | 0.325 | 0.391 | 2.68E-04 | 1.37 | 1.16 | 1.63 | 0.345 | 0.391 | 3.31E-03 | 1.23 | 1.07 | 1.41 | 6.86E-06 | 1.28 | 0.313 |
| rs9267649  | 6 | 31932807  | A | G | NEU1      | 0.101 | 0.072 | 2.73E-02 | 0.72 | 0.53 | 0.97 | 0.181 | 0.125 | 7.57E-05 | 0.66 | 0.54 | 0.81 | 9.33E-06 | 0.69 | 0.711 |
| rs3134954  | 6 | 32179871  | C | T | TNXB      | 0.074 | 0.052 | 4.44E-02 | 0.70 | 0.50 | 0.9  |       |       |          |      |      |      |          |      |       |

|                         |   |          |   |   |             |       |       |          |      |      |      |       |       |          |      |      |      |          |      |       |
|-------------------------|---|----------|---|---|-------------|-------|-------|----------|------|------|------|-------|-------|----------|------|------|------|----------|------|-------|
| rs2269425               | 6 | 32231617 | A | G | PPT2        | 0.085 | 0.119 | 4.60E-03 | 1.47 | 1.12 | 1.91 | 0.136 | 0.179 | 6.91E-05 | 1.43 | 1.20 | 1.71 | 4.06E-07 | 1.47 | 0.977 |
| rs3134603               | 6 | 32233980 | A | G | PPT2        | 0.089 | 0.065 | 5.59E-02 | 0.74 | 0.54 | 1.01 | 0.140 | 0.088 | 2.39E-05 | 0.60 | 0.48 | 0.76 | 3.30E-06 | 0.64 | 0.268 |
| rs3134943               | 6 | 32255739 | T | C | RNF5        | 0.077 | 0.050 | 1.84E-02 | 0.66 | 0.46 | 0.93 | 0.143 | 0.084 | 4.64E-06 | 0.57 | 0.45 | 0.73 | 1.70E-07 | 0.59 | 0.472 |
| rs3132946               | 6 | 32298006 | A | G | NOTCH4      | 0.061 | 0.042 | 7.57E-02 | 0.71 | 0.48 | 1.04 | 0.139 | 0.082 | 8.05E-06 | 0.58 | 0.45 | 0.73 | 1.33E-06 | 0.60 | 0.342 |
| rs3130304 <sup>b</sup>  | 6 | 32315159 | A | G | none        | 0.349 | 0.273 | 6.67E-05 | 0.69 | 0.58 | 0.83 | 0.241 | 0.221 | 1.03E-01 | 0.87 | 1.03 | 1.03 | 1.29E-04 | 0.79 | 0.082 |
| rs411326                | 6 | 32319295 | T | C | LOC401252   | 0.234 | 0.271 | 2.56E-02 | 1.24 | 1.03 | 1.49 | 0.257 | 0.310 | 1.59E-04 | 1.33 | 1.15 | 1.55 | 6.96E-06 | 1.30 | 0.484 |
| rs9267992               | 6 | 32328375 | G | A | LOC401252   | 0.066 | 0.051 | 1.59E-01 | 0.77 | 0.54 | 1.10 | 0.142 | 0.091 | 4.98E-05 | 0.62 | 0.49 | 0.78 | 2.36E-05 | 0.66 | 0.286 |
| rs570963 <sup>b</sup>   | 6 | 32397572 | G | A | C6orf10     | 0.158 | 0.246 | 8.41E-08 | 1.72 | 1.41 | 2.11 | 0.098 | 0.142 | 5.05E-05 | 1.51 | 1.24 | 1.85 | 2.18E-11 | 1.62 | 0.321 |
| rs2076537               | 6 | 32425613 | A | G | C6orf10     | 0.321 | 0.400 | 6.35E-05 | 1.41 | 1.19 | 1.67 | 0.355 | 0.389 | 1.52E-02 | 1.19 | 1.03 | 1.37 | 6.37E-06 | 1.28 | 0.148 |
| rs2395148               | 6 | 32429532 | T | G | C6orf10     | 0.021 | 0.056 | 8.42E-07 | 2.90 | 1.87 | 4.49 | 0.023 | 0.056 | 1.77E-09 | 2.67 | 1.94 | 3.68 | 9.95E-15 | 2.75 | 0.776 |
| rs1265761 <sup>b</sup>  | 6 | 32429575 | G | A | C6orf10     | 0.087 | 0.143 | 3.72E-05 | 1.69 | 1.31 | 2.17 | 0.051 | 0.060 | 3.11E-01 | 1.16 | 0.87 | 1.54 | 1.01E-04 | 1.45 | 0.036 |
| rs1265759 <sup>b</sup>  | 6 | 32430371 | C | T | C6orf10     | 0.387 | 0.468 | 9.28E-05 | 1.39 | 1.18 | 1.64 | 0.421 | 0.456 | 2.90E-02 | 1.17 | 1.02 | 1.34 | 1.88E-05 | 1.26 | 0.093 |
| rs1265758 <sup>b</sup>  | 6 | 32431507 | A | G | C6orf10     | 0.382 | 0.471 | 1.55E-05 | 1.44 | 1.22 | 1.70 | 0.414 | 0.450 | 2.74E-02 | 1.17 | 1.02 | 1.34 | 6.03E-06 | 1.28 | 0.050 |
| rs6907322               | 6 | 32432923 | A | G | C6orf10     | 0.211 | 0.309 | 2.67E-08 | 1.68 | 1.40 | 2.02 | 0.178 | 0.237 | 6.70E-06 | 1.46 | 1.24 | 1.72 | 1.27E-12 | 1.55 | 0.253 |
| rs2395150               | 6 | 32434023 | G | A | C6orf10     | 0.381 | 0.467 | 3.50E-05 | 1.42 | 1.20 | 1.67 | 0.414 | 0.450 | 2.68E-02 | 1.17 | 1.02 | 1.34 | 1.23E-05 | 1.26 | 0.081 |
| rs2073048               | 6 | 32443411 | A | G | C6orf10     | 0.124 | 0.166 | 1.05E-03 | 1.47 | 1.17 | 1.85 | 0.127 | 0.176 | 1.05E-05 | 1.50 | 1.25 | 1.80 | 1.74E-08 | 1.50 | 0.781 |
| rs3129943               | 6 | 32446673 | G | A | C6orf10     | 0.213 | 0.286 | 9.31E-05 | 1.45 | 1.20 | 1.75 | 0.246 | 0.264 | 1.26E-01 | 1.13 | 0.97 | 1.32 | 2.28E-04 | 1.25 | 0.043 |
| rs2395157               | 6 | 32456123 | G | A | none        | 0.231 | 0.226 | 5.90E-01 | 0.95 | 0.78 | 1.15 | 0.272 | 0.344 | 3.37E-06 | 1.41 | 1.22 | 1.62 | 2.96E-04 | 1.24 | 0.001 |
| rs4424066               | 6 | 32462406 | G | A | none        | 0.345 | 0.357 | 6.18E-01 | 1.04 | 0.88 | 1.24 | 0.415 | 0.498 | 7.18E-07 | 1.40 | 1.23 | 1.60 | 1.71E-05 | 1.26 | 0.005 |
| rs3117098               | 6 | 32466491 | G | A | BTNL2       | 0.408 | 0.380 | 1.96E-01 | 0.90 | 0.76 | 1.06 | 0.317 | 0.224 | 2.09E-09 | 0.61 | 0.52 | 0.72 | 8.88E-08 | 0.73 | 0.001 |
| rs2076530               | 6 | 32471794 | C | T | BTNL2       | 0.371 | 0.368 | 8.98E-01 | 0.99 | 0.84 | 1.17 | 0.423 | 0.497 | 1.77E-06 | 1.38 | 1.21 | 1.58 | 1.56E-04 | 1.23 | 0.001 |
| rs4248166               | 6 | 32474399 | C | T | BTNL2       | 0.134 | 0.185 | 1.83E-04 | 1.52 | 1.22 | 1.89 | 0.160 | 0.216 | 3.11E-06 | 1.48 | 1.26 | 1.75 | 3.47E-09 | 1.49 | 0.868 |
| rs3763305               | 6 | 32477466 | A | G | BTNL2       | 0.024 | 0.035 | 1.37E-01 | 1.42 | 0.89 | 2.26 | 0.046 | 0.076 | 2.24E-05 | 1.78 | 1.36 | 2.33 | 9.11E-06 | 1.68 | 0.404 |
| rs10947262 <sup>b</sup> | 6 | 32481290 | T | C | BTNL2       | 0.088 | 0.139 | 5.99E-05 | 1.67 | 1.30 | 2.16 | 0.075 | 0.109 | 1.79E-04 | 1.53 | 1.23 | 1.91 | 3.20E-08 | 1.60 | 0.532 |
| rs3806156               | 6 | 32481676 | T | G | BTNL2       | 0.320 | 0.365 | 3.89E-02 | 1.20 | 1.01 | 1.42 | 0.349 | 0.453 | 3.45E-10 | 1.54 | 1.35 | 1.77 | 1.74E-10 | 1.42 | 0.012 |
| rs3763313               | 6 | 32484449 | C | A | BTNL2       | 0.167 | 0.225 | 1.01E-04 | 1.49 | 1.22 | 1.83 | 0.188 | 0.247 | 1.82E-05 | 1.41 | 1.20 | 1.65 | 4.24E-09 | 1.46 | 0.767 |
| rs2395163               | 6 | 32495787 | C | T | BTNL2       | 0.147 | 0.176 | 5.56E-02 | 1.24 | 0.99 | 1.54 | 0.201 | 0.258 | 2.13E-05 | 1.41 | 1.20 | 1.66 | 2.99E-06 | 1.36 | 0.325 |
| rs3135363               | 6 | 32497626 | G | A | BTNL2       | 0.363 | 0.260 | 4.80E-08 | 0.60 | 0.50 | 0.72 | 0.292 | 0.218 | 9.10E-07 | 0.67 | 0.57 | 0.78 | 2.00E-13 | 0.64 | 0.467 |
| rs9501626               | 6 | 32508322 | A | C | HLA-DRA     | 0.104 | 0.135 | 2.52E-02 | 1.33 | 1.03 | 1.71 | 0.109 | 0.174 | 3.15E-08 | 1.69 | 1.40 | 2.03 | 4.72E-09 | 1.56 | 0.119 |
| rs2395175               | 6 | 32513004 | A | G | HLA-DRA     | 0.057 | 0.074 | 6.83E-02 | 1.35 | 0.98 | 1.87 | 0.154 | 0.194 | 1.80E-04 | 1.40 | 1.18 | 1.68 | 2.11E-05 | 1.40 | 0.826 |
| rs3129882               | 6 | 32517508 | A | G | HLA-DRA     | 0.442 | 0.432 | 6.42E-01 | 0.96 | 0.82 | 1.13 | 0.567 | 0.634 | 2.58E-05 | 1.35 | 1.56 | 1.18 | 4.01E-03 | 1.17 | 0.002 |
| rs6903608               | 6 | 32536263 | C | T | HLA-DRA     | 0.462 | 0.428 | 9.76E-02 | 0.87 | 0.74 | 1.03 | 0.321 | 0.239 | 1.02E-07 | 0.65 | 0.56 | 0.76 | 4.96E-07 | 0.75 | 0.012 |
| rs2395185               | 6 | 32541145 | T | G | HLA-DRA     | 0.237 | 0.251 | 5.42E-01 | 1.06 | 0.88 | 1.28 | 0.321 | 0.388 | 5.33E-05 | 1.34 | 1.16 | 1.54 | 1.47E-04 | 1.24 | 0.041 |
| rs660895                | 6 | 32685358 | G | A | HLA-DRB1    | 0.102 | 0.177 | 2.41E-08 | 1.93 | 1.53 | 2.44 | 0.190 | 0.271 | 1.48E-09 | 1.62 | 1.39 | 1.90 | 1.14E-16 | 1.73 | 0.266 |
| rs17533090 <sup>b</sup> | 6 | 32698700 | T | G | HLA-DQA1    | 0.161 | 0.233 | 2.10E-05 | 1.55 | 1.27 | 1.90 | 0.159 | 0.190 | 2.47E-02 | 1.22 | 1.03 | 1.45 | 5.14E-06 | 1.36 | 0.067 |
| rs3129763               | 6 | 32698903 | A | G | HLA-DQA1    | 0.347 | 0.270 | 3.80E-05 | 0.69 | 0.57 | 0.82 | 0.240 | 0.188 | 9.62E-05 | 0.71 | 0.60 | 0.84 | 2.16E-08 | 0.70 | 0.732 |
| rs9275184               | 6 | 32762692 | C | T | HLA-DQA1    | 0.053 | 0.073 | 5.27E-02 | 1.38 | 0.99 | 1.92 | 0.100 | 0.145 | 3.24E-05 | 1.52 | 1.25 | 1.84 | 1.40E-06 | 1.52 | 0.524 |
| rs7774434 <sup>b</sup>  | 6 | 32765556 | C | T | HLA-DQB1    | 0.346 | 0.475 | 2.33E-10 | 1.71 | 1.45 | 2.02 | 0.371 | 0.477 | 3.50E-18 | 1.82 | 1.59 | 2.09 | 2.38E-26 | 1.75 | 0.377 |
| rs7775228               | 6 | 32766057 | C | T | HLA-DQB1    | 0.149 | 0.186 | 1.16E-02 | 1.32 | 1.06 | 1.64 | 0.126 | 0.202 | 1.32E-10 | 1.77 | 1.48 | 2.10 | 9.74E-11 | 1.56 | 0.047 |
| rs2647012               | 6 | 32772436 | T | C | HLA-DQB1    | 0.303 | 0.314 | 5.09E-01 | 1.06 | 0.89 | 1.27 | 0.396 | 0.317 | 1.80E-05 | 0.73 | 0.63 | 0.84 | 2.37E-03 | 0.84 | 0.001 |
| rs9357152               | 6 | 32772938 | G | A | HLA-DQB1    | 0.396 | 0.309 | 5.10E-06 | 0.67 | 0.56 | 0.79 | 0.258 | 0.191 | 1.25E-06 | 0.65 | 0.55 | 0.78 | 4.24E-11 | 0.66 | 0.934 |
| rs9275312               | 6 | 32773706 | G | A | HLA-DQB1    | 0.084 | 0.148 | 1.42E-07 | 1.96 | 1.52 | 2.52 | 0.130 | 0.219 | 2.77E-13 | 1.88 | 1.59 | 2.22 | 2.14E-20 | 1.94 | 0.942 |
| rs9275374 <sup>b</sup>  | 6 | 32776504 | T | C | HLA-DQB1    | 0.180 | 0.259 | 4.11E-07 | 1.65 | 1.36 | 2.01 | 0.246 | 0.364 | 4.45E-14 | 1.73 | 1.50 | 1.99 | 3.70E-19 | 1.69 | 0.581 |
| rs9275388 <sup>b</sup>  | 6 | 32777062 | C | T | HLA-DQB1    | 0.179 | 0.261 | 1.98E-07 | 1.67 | 1.38 | 2.03 | 0.245 | 0.364 | 3.07E-14 | 1.73 | 1.50 | 1.99 | 1.50E-19 | 1.69 | 0.610 |
| rs9275390               | 6 | 32777134 | C | T | HLA-DQB1    | 0.180 | 0.262 | 1.90E-07 | 1.67 | 1.38 | 2.03 | 0.246 | 0.364 | 4.33E-14 | 1.73 | 1.50 | 1.99 | 3.31E-21 | 1.74 | 0.609 |
| rs9275393 <sup>b</sup>  | 6 | 32777417 | A | G | HLA-DQB1    | 0.180 | 0.261 | 2.16E-07 | 1.67 | 1.37 | 2.03 | 0.246 | 0.364 | 4.47E-14 | 1.73 | 1.50 | 1.99 | 2.38E-19 | 1.69 | 0.619 |
| rs2647050               | 6 | 32777745 | C | T | HLA-DQB1    | 0.524 | 0.427 | 4.86E-07 | 0.66 | 0.56 | 0.77 | 0.363 | 0.321 | 3.31E-03 | 0.80 | 0.70 | 0.93 | 2.58E-08 | 0.73 | 0.074 |
| rs9275406 <sup>b</sup>  | 6 | 32777933 | T | C | HLA-DQB1    | 0.180 | 0.261 | 2.16E-07 | 1.67 | 1.37 | 2.03 | 0.246 | 0.364 | 4.45E-14 | 1.73 | 1.50 | 1.99 | 2.38E-19 | 1.69 | 0.619 |
| rs9275407 <sup>b</sup>  | 6 | 32778015 | T | G | HLA-DQB1    | 0.179 | 0.261 | 2.12E-07 | 1.67 | 1.38 | 2.03 | 0.246 | 0.364 | 5.85E-14 | 1.72 | 1.49 | 1.98 | 2.94E-19 | 1.69 | 0.636 |
| rs9275418 <sup>b</sup>  | 6 | 32778222 | G | A | HLA-DQB1    | 0.179 | 0.261 | 1.96E-07 | 1.67 | 1.38 | 2.03 | 0.246 | 0.364 | 6.93E-14 | 1.72 | 1.49 | 1.98 | 3.17E-19 | 1.69 | 0.657 |
| rs2856718               | 6 | 32778233 | T | C | HLA-DQB1    | 0.524 | 0.426 | 3.63E-07 | 0.65 | 0.55 | 0.77 | 0.362 | 0.320 | 2.77E-03 | 0.80 | 0.69 | 0.93 | 1.53E-08 | 0.73 | 0.076 |
| rs9275424 <sup>b</sup>  | 6 | 32778554 | G | A | QB1/DQA2 ir | 0.179 | 0.264 | 9.21E-08 | 1.70 | 1.40 | 2.06 | 0.246 | 0.364 | 6.93E-14 | 1.72 | 1.49 | 1.98 | 1.55E-19 | 1.70 | 0.742 |
| rs9275425 <sup>b</sup>  | 6 | 32778852 | A | C | QB1/DQA2 ir | 0.180 | 0.257 | 6.45E-07 | 1.64 | 1.35 | 1.99 | 0.246 | 0.362 | 9.42E-14 | 1.71 | 1.49 | 1.97 | 1.21E-18 | 1.67 | 0.575 |
| rs9275427 <sup>b</sup>  | 6 | 32778893 | T | C | QB1/DQA2 ir | 0.180 | 0.261 | 2.16E-07 | 1.67 | 1.37 | 2.03 | 0.246 | 0.362 | 9.42E-14 | 1.71 | 1.49 | 1.97 | 4.75E-19 | 1.68 | 0.660 |
| rs9275428 <sup>b</sup>  | 6 | 32778956 | G | A | QB1/DQA2 ir | 0.180 | 0.261 | 2.16E-07 | 1.67 | 1.37 | 2.03 | 0.245 | 0.362 | 8.97E-14 | 1.71 | 1.49 | 1.97 | 4.75E-19 | 1.68 | 0.660 |
| rs13192471 <sup>b</sup> | 6 | 32779081 | C | T | QB1/DQA2 ir | 0.121 | 0.184 | 2.09E-06 | 1.71 | 1.37 | 2.14 | 0.141 | 0.218 | 5.62E-10 | 1.70 | 1.44 | 2.01 | 2.46E-14 | 1.68 | 0.824 |
| rs9275439 <sup>b</sup>  | 6 | 32779499 | C | T | QB1/DQA2 ir | 0.180 | 0.261 | 2.16E-07 | 1.67 | 1.37 | 2.03 | 0.245 | 0.362 | 8.04E-14 | 1.72 | 1.49 | 1.98 | 4.08E-19 | 1.68 | 0.649 |
| rs16898264 <sup>b</sup> | 6 | 32785130 | A | G | QB1/DQA2 ir | 0.524 | 0.425 | 4.05E-07 | 0.65 | 0.55 | 0.77 | 0.353 | 0.323 | 4.90E-03 | 0.81 | 0.70 | 0.94 | 8.92E-08 | 0.74 | 0.065 |

|            |    |           |   |   |                   |       |       |          |      |      |      |       |       |          |      |      |      |          |      |       |
|------------|----|-----------|---|---|-------------------|-------|-------|----------|------|------|------|-------|-------|----------|------|------|------|----------|------|-------|
| rs7745656  | 6  | 32788948  | T | G | <i>HLA-DQA2</i>   | 0.486 | 0.400 | 6.65E-06 | 0.68 | 0.58 | 0.81 | 0.282 | 0.269 | 1.83E-01 | 0.90 | 0.77 | 1.05 | 4.01E-05 | 0.79 | 0.019 |
| rs9276644  | 6  | 32853021  | C | T | <i>HLA-DQA2</i>   | 0.427 | 0.387 | 2.24E-02 | 0.82 | 0.70 | 0.97 | 0.341 | 0.289 | 7.99E-04 | 0.78 | 0.67 | 0.90 | 6.52E-05 | 0.80 | 0.618 |
| rs719654   | 6  | 32860117  | A | G | <i>none</i>       | 0.213 | 0.225 | 4.16E-01 | 1.08 | 0.89 | 1.32 | 0.224 | 0.284 | 4.84E-05 | 1.37 | 1.18 | 1.59 | 2.98E-04 | 1.25 | 0.074 |
| rs2219893  | 6  | 32877641  | C | T | <i>none</i>       | 0.325 | 0.380 | 1.66E-03 | 1.31 | 1.11 | 1.56 | 0.321 | 0.378 | 6.99E-04 | 1.27 | 1.11 | 1.47 | 7.41E-06 | 1.28 | 0.714 |
| rs3129299  | 6  | 33008765  | T | C | <i>HLA-DMB</i>    | 0.201 | 0.243 | 1.59E-02 | 1.27 | 1.05 | 1.54 | 0.163 | 0.207 | 1.80E-03 | 1.31 | 1.11 | 1.55 | 6.56E-05 | 1.30 | 0.773 |
| rs2395296  | 6  | 33019792  | A | G | <i>HLA-DMB</i>    | 0.285 | 0.266 | 1.93E-01 | 0.89 | 0.74 | 1.06 | 0.314 | 0.252 | 6.77E-05 | 0.73 | 0.62 | 0.85 | 9.78E-05 | 0.79 | 0.111 |
| rs194682   | 6  | 33022591  | T | C | <i>HLA-DMB</i>    | 0.342 | 0.383 | 1.85E-02 | 1.22 | 1.03 | 1.45 | 0.333 | 0.388 | 9.18E-04 | 1.27 | 1.10 | 1.46 | 6.11E-05 | 1.25 | 0.784 |
| rs209473   | 6  | 33030886  | A | C | <i>HLA-DMA</i>    | 0.478 | 0.438 | 2.75E-02 | 0.83 | 0.71 | 0.98 | 0.451 | 0.391 | 2.64E-04 | 0.77 | 0.67 | 0.89 | 3.77E-05 | 0.80 | 0.548 |
| rs209474   | 6  | 33032562  | G | A | <i>HLA-DMA</i>    | 0.393 | 0.432 | 2.71E-02 | 1.21 | 1.02 | 1.42 | 0.404 | 0.465 | 4.35E-04 | 1.28 | 1.12 | 1.47 | 4.58E-05 | 1.25 | 0.611 |
| rs9277535  | 6  | 33162839  | G | A | <i>HLA-DPB1</i>   | 0.242 | 0.306 | 2.00E-04 | 1.41 | 1.17 | 1.68 | 0.242 | 0.327 | 2.58E-09 | 1.57 | 1.35 | 1.82 | 1.95E-12 | 1.50 | 0.344 |
| rs9277554  | 6  | 33163516  | T | C | <i>HLA-DPB1</i>   | 0.281 | 0.341 | 4.98E-04 | 1.36 | 1.14 | 1.62 | 0.291 | 0.358 | 3.69E-06 | 1.41 | 1.22 | 1.63 | 6.10E-09 | 1.39 | 0.787 |
| rs9277565  | 6  | 33164875  | T | C | <i>HLA-DPB1</i>   | 0.202 | 0.256 | 5.95E-04 | 1.40 | 1.15 | 1.69 | 0.203 | 0.280 | 1.03E-08 | 1.57 | 1.35 | 1.83 | 2.62E-11 | 1.50 | 0.341 |
| rs2281389  | 6  | 33167774  | G | A | <i>HLA-DPB1</i>   | 0.175 | 0.234 | 1.30E-04 | 1.48 | 1.21 | 1.80 | 0.171 | 0.244 | 9.21E-09 | 1.61 | 1.37 | 1.90 | 6.44E-12 | 1.55 | 0.525 |
| rs3128917  | 6  | 33167974  | G | T | <i>HLA-DPB1</i>   | 0.241 | 0.294 | 1.05E-03 | 1.36 | 1.13 | 1.63 | 0.252 | 0.313 | 1.41E-05 | 1.39 | 1.20 | 1.62 | 5.28E-08 | 1.38 | 0.846 |
| rs3117222  | 6  | 33168927  | T | C | <i>HLA-DPB1</i>   | 0.241 | 0.294 | 1.05E-03 | 1.36 | 1.13 | 1.63 | 0.253 | 0.313 | 1.52E-05 | 1.39 | 1.20 | 1.61 | 5.73E-08 | 1.37 | 0.855 |
| rs2064478  | 6  | 33180244  | T | C | <i>HLA-DPB2</i>   | 0.220 | 0.278 | 2.77E-04 | 1.41 | 1.17 | 1.70 | 0.221 | 0.276 | 3.75E-05 | 1.39 | 1.19 | 1.62 | 5.08E-08 | 1.39 | 0.829 |
| rs3117230  | 6  | 33183613  | G | A | <i>HLA-DPB2</i>   | 0.219 | 0.278 | 2.69E-04 | 1.41 | 1.17 | 1.71 | 0.221 | 0.275 | 5.07E-05 | 1.38 | 1.18 | 1.61 | 6.52E-08 | 1.39 | 0.793 |
| rs1883414  | 6  | 33194426  | A | G | <i>HLA-DPB2</i>   | 0.343 | 0.354 | 4.57E-01 | 1.07 | 0.90 | 1.27 | 0.309 | 0.376 | 1.39E-05 | 1.36 | 1.19 | 1.57 | 1.35E-04 | 1.24 | 0.029 |
| rs3117016  | 6  | 33203494  | A | G | <i>HLA-DPB2</i>   | 0.408 | 0.445 | 8.51E-02 | 1.16 | 0.98 | 1.36 | 0.394 | 0.464 | 1.06E-04 | 1.31 | 1.14 | 1.51 | 1.64E-05 | 1.26 | 0.185 |
| rs6901221  | 6  | 33206254  | C | A | <i>none</i>       | 0.121 | 0.172 | 3.14E-04 | 1.52 | 1.21 | 1.91 | 0.158 | 0.215 | 3.22E-06 | 1.50 | 1.26 | 1.77 | 2.15E-09 | 1.51 | 0.967 |
| rs2855430  | 6  | 33249258  | A | G | <i>COL11A2</i>    | 0.098 | 0.132 | 8.27E-03 | 1.40 | 1.09 | 1.81 | 0.133 | 0.191 | 2.96E-07 | 1.59 | 1.33 | 1.91 | 9.65E-09 | 1.53 | 0.433 |
| rs2855459  | 6  | 33262634  | A | G | <i>COL11A2</i>    | 0.096 | 0.128 | 1.46E-02 | 1.38 | 1.07 | 1.78 | 0.133 | 0.192 | 1.54E-07 | 1.61 | 1.35 | 1.93 | 1.02E-08 | 1.53 | 0.335 |
| rs439205   | 6  | 33281820  | A | G | <i>HSD17B8</i>    | 0.240 | 0.264 | 1.96E-01 | 1.13 | 0.94 | 1.36 | 0.236 | 0.314 | 3.90E-08 | 1.51 | 1.31 | 1.76 | 3.10E-07 | 1.35 | 0.016 |
| rs421446   | 6  | 33282761  | G | A | <i>HSD17B8</i>    | 0.287 | 0.323 | 6.79E-02 | 1.18 | 0.99 | 1.41 | 0.274 | 0.356 | 1.14E-07 | 1.47 | 1.28 | 1.70 | 9.06E-08 | 1.35 | 0.045 |
| rs4706258  | 6  | 70409857  | G | A | <i>none</i>       | 0.221 | 0.155 | 2.16E-05 | 0.63 | 0.50 | 0.78 | 0.285 | 0.279 | 1.73E-01 | 1.00 | 0.86 | 1.16 | 1.64E-02 | 0.86 | 0.001 |
| rs13216266 | 6  | 140059450 | T | G | <i>Hs.544400</i>  | 0.329 | 0.294 | 4.01E-02 | 0.83 | 0.70 | 0.99 | 0.328 | 0.397 | 1.99E-05 | 1.35 | 1.18 | 1.56 | 3.73E-02 | 1.12 | 0.000 |
| rs6929952  | 6  | 158571383 | T | C | <i>Hs.237825</i>  | 0.398 | 0.395 | 6.88E-01 | 1.04 | 0.88 | 1.22 | 0.417 | 0.346 | 5.52E-05 | 0.75 | 0.65 | 0.86 | 5.79E-03 | 0.86 | 0.004 |
| rs2197100  | 6  | 165551781 | A | G | <i>none</i>       | 0.232 | 0.161 | 8.09E-05 | 0.65 | 0.53 | 0.81 | 0.260 | 0.259 | 9.82E-01 | 1.00 | 0.86 | 1.17 | 2.29E-02 | 0.86 | 0.001 |
| rs10250643 | 7  | 24502175  | G | T | <i>none</i>       | 0.229 | 0.203 | 1.06E-01 | 0.85 | 0.69 | 1.04 | 0.278 | 0.208 | 8.83E-06 | 0.69 | 0.58 | 0.81 | 1.25E-05 | 0.75 | 0.139 |
| rs2255365  | 7  | 24528186  | C | A | <i>none</i>       | 0.436 | 0.411 | 1.43E-01 | 0.88 | 0.75 | 1.04 | 0.476 | 0.408 | 6.07E-05 | 0.76 | 0.66 | 0.87 | 9.23E-05 | 0.81 | 0.180 |
| rs1476520  | 7  | 24762754  | C | T | <i>DFNA5</i>      | 0.416 | 0.426 | 7.73E-01 | 1.03 | 0.87 | 1.21 | 0.474 | 0.402 | 5.06E-05 | 0.75 | 0.66 | 0.86 | 6.18E-03 | 0.86 | 0.008 |
| rs1012775  | 7  | 24815354  | A | G | <i>OSBPL3</i>     | 0.413 | 0.398 | 4.27E-01 | 0.93 | 0.79 | 1.10 | 0.345 | 0.416 | 2.67E-05 | 1.35 | 1.17 | 1.55 | 8.31E-03 | 1.15 | 0.001 |
| rs7785415  | 7  | 25877852  | G | A | <i>none</i>       | 0.149 | 0.133 | 2.44E-01 | 0.87 | 0.68 | 1.10 | 0.092 | 0.138 | 9.06E-05 | 1.49 | 1.22 | 1.82 | 1.75E-02 | 1.21 | 0.000 |
| rs4728142  | 7  | 128361203 | A | G | <i>IRFS/TNPO3</i> | 0.424 | 0.479 | 9.48E-03 | 1.24 | 1.05 | 1.46 | 0.445 | 0.498 | 1.43E-03 | 1.25 | 1.09 | 1.43 | 5.97E-05 | 1.24 | 0.976 |
| rs10488631 | 7  | 128381419 | C | T | <i>IRFS/TNPO3</i> | 0.083 | 0.121 | 4.24E-03 | 1.48 | 1.13 | 1.93 | 0.107 | 0.169 | 2.17E-08 | 1.71 | 1.42 | 2.06 | 2.78E-10 | 1.63 | 0.365 |
| rs11784810 | 8  | 24482929  | G | T | <i>none</i>       | 0.373 | 0.413 | 3.05E-02 | 1.20 | 1.02 | 1.42 | 0.373 | 0.432 | 8.54E-04 | 1.26 | 1.10 | 1.45 | 7.16E-05 | 1.24 | 0.626 |
| rs12678383 | 8  | 24498107  | T | G | <i>none</i>       | 0.255 | 0.289 | 4.75E-02 | 1.20 | 1.00 | 1.44 | 0.247 | 0.300 | 4.56E-04 | 1.30 | 1.12 | 1.51 | 7.50E-05 | 1.26 | 0.493 |
| rs7821268  | 8  | 29520356  | C | T | <i>none</i>       | 0.227 | 0.218 | 4.52E-01 | 0.93 | 0.76 | 1.13 | 0.213 | 0.281 | 8.49E-07 | 1.48 | 1.26 | 1.73 | 7.78E-04 | 1.23 | 0.000 |
| rs4732980  | 8  | 29529350  | A | G | <i>none</i>       | 0.333 | 0.315 | 1.86E-01 | 0.89 | 0.74 | 1.06 | 0.306 | 0.380 | 4.62E-06 | 1.39 | 1.21 | 1.59 | 6.25E-03 | 1.17 | 0.000 |
| rs10866875 | 8  | 29532541  | G | T | <i>none</i>       | 0.201 | 0.193 | 5.53E-01 | 0.94 | 0.76 | 1.15 | 0.185 | 0.247 | 4.27E-06 | 1.47 | 1.25 | 1.72 | 1.35E-03 | 1.23 | 0.001 |
| rs12334531 | 8  | 74426184  | T | C | <i>RDH10</i>      | 0.445 | 0.361 | 9.86E-06 | 0.68 | 0.58 | 0.81 | 0.423 | 0.400 | 2.29E-01 | 0.92 | 0.80 | 1.05 | 1.13E-04 | 0.81 | 0.011 |
| rs279479   | 8  | 94180024  | C | T | <i>none</i>       | 0.521 | 0.453 | 1.25E-03 | 0.76 | 0.65 | 0.90 | 0.489 | 0.447 | 1.11E-02 | 0.84 | 0.73 | 0.96 | 6.36E-05 | 0.81 | 0.390 |
| rs7813101  | 8  | 97733748  | A | G | <i>PGCP</i>       | 0.260 | 0.329 | 3.70E-04 | 1.38 | 1.16 | 1.65 | 0.288 | 0.328 | 1.46E-02 | 1.20 | 1.04 | 1.39 | 2.43E-05 | 1.27 | 0.252 |
| rs7834444  | 8  | 99455892  | T | C | <i>Hs.386298</i>  | 0.315 | 0.348 | 1.36E-01 | 1.14 | 0.96 | 1.35 | 0.318 | 0.249 | 2.50E-05 | 0.72 | 0.61 | 0.84 | 3.24E-02 | 0.88 | 0.000 |
| rs7838130  | 8  | 99456091  | T | C | <i>Hs.386298</i>  | 0.316 | 0.348 | 1.43E-01 | 1.14 | 0.96 | 1.35 | 0.318 | 0.249 | 2.47E-05 | 0.72 | 0.61 | 0.84 | 3.10E-02 | 0.88 | 0.000 |
| rs4259391  | 8  | 99460461  | T | C | <i>Hs.386298</i>  | 0.300 | 0.331 | 9.77E-02 | 1.16 | 0.97 | 1.38 | 0.310 | 0.242 | 3.05E-05 | 0.72 | 0.61 | 0.84 | 4.34E-02 | 0.89 | 0.000 |
| rs6468721  | 8  | 101589274 | C | T | <i>none</i>       | 0.232 | 0.259 | 1.14E-01 | 1.16 | 0.96 | 1.41 | 0.259 | 0.198 | 2.90E-05 | 0.70 | 0.59 | 0.83 | 3.35E-02 | 0.87 | 0.000 |
| rs2935548  | 8  | 101749531 | G | A | <i>none</i>       | 0.148 | 0.166 | 1.92E-01 | 1.16 | 0.93 | 1.45 | 0.095 | 0.138 | 8.21E-05 | 1.49 | 1.22 | 1.82 | 3.33E-04 | 1.31 | 0.141 |
| rs1529335  | 8  | 129085529 | T | C | <i>PVT1</i>       | 0.108 | 0.071 | 1.97E-03 | 0.63 | 0.46 | 0.84 | 0.172 | 0.133 | 3.79E-03 | 0.75 | 0.61 | 0.91 | 2.12E-05 | 0.70 | 0.376 |
| rs895236   | 9  | 4028228   | T | C | <i>GLIS3</i>      | 0.115 | 0.077 | 1.28E-03 | 0.62 | 0.46 | 0.83 | 0.132 | 0.102 | 1.20E-02 | 0.62 | 0.60 | 0.94 | 5.83E-05 | 0.69 | 0.323 |
| rs2381904  | 9  | 8835177   | A | C | <i>PTPRD</i>      | 0.311 | 0.291 | 2.64E-01 | 0.90 | 0.76 | 1.08 | 0.256 | 0.203 | 4.13E-05 | 0.70 | 0.59 | 0.83 | 4.65E-04 | 0.80 | 0.078 |
| rs1972797  | 9  | 8837353   | C | A | <i>PTPRD</i>      | 0.487 | 0.465 | 2.18E-01 | 0.90 | 0.77 | 1.06 | 0.428 | 0.365 | 9.13E-05 | 0.75 | 0.65 | 0.87 | 3.62E-04 | 0.82 | 0.137 |
| rs10511828 | 9  | 28618500  | C | T | <i>LINGO2</i>     | 0.064 | 0.028 | 1.41E-05 | 0.38 | 0.24 | 0.60 | 0.068 | 0.073 | 5.61E-01 | 1.08 | 0.83 | 1.40 | 1.05E-01 | 0.83 | 0.000 |
| rs1529952  | 9  | 85909367  | T | C | <i>none</i>       | 0.316 | 0.367 | 4.80E-03 | 1.28 | 1.08 | 1.52 | 0.336 | 0.386 | 1.31E-03 | 1.26 | 1.09 | 1.44 | 1.64E-05 | 1.27 | 0.911 |
| rs3124607  | 9  | 138534660 | A | G | <i>NOTCH1</i>     | 0.294 | 0.281 | 3.34E-01 | 0.91 | 0.76 | 1.10 | 0.328 | 0.257 | 1.20E-05 | 0.71 | 0.61 | 0.83 | 7.93E-05 | 0.79 | 0.037 |
| rs7477689  | 10 | 30055806  | G | A | <i>SVIL</i>       | 0.127 | 0.129 | 9.51E-01 | 0.99 | 0.78 | 1.27 | 0.092 | 0.135 | 3.82E-05 | 1.54 | 1.25 | 1.89 | 1.82E-03 | 1.28 | 0.008 |
| rs1927461  | 10 | 30084320  | C | T | <i>none</i>       | 0.185 | 0.173 | 2.73E-01 | 0.89 | 0.72 | 1.10 | 0.144 | 0.198 | 2.87E-05 | 1.45 | 1.22 | 1.73 | 8.40E-03 | 1.20 | 0.000 |
| rs10993994 | 10 | 51219502  | T | C | <i>MSMB</i>       | 0.428 | 0.477 | 3.54E-02 | 1.19 | 1.01 | 1.41 | 0.389 | 0.455 | 4.27E-04 | 1.28 | 1.12 | 1.46 | 2.92E-05 | 1.25 | 0.470 |
| rs2345201  | 10 | 82662797  | G | A | <i>none</i>       | 0.187 |       |          |      |      |      |       |       |          |      |      |      |          |      |       |



|                        |    |           |   |   |                  |       |       |          |      |      |      |       |       |          |      |      |      |          |      |       |
|------------------------|----|-----------|---|---|------------------|-------|-------|----------|------|------|------|-------|-------|----------|------|------|------|----------|------|-------|
| rs10886214             | 10 | 85117719  | T | C | none             | 0.183 | 0.259 | 7.86E-06 | 1.56 | 1.28 | 1.89 | 0.217 | 0.227 | 4.77E-01 | 1.06 | 0.90 | 1.25 | 1.41E-03 | 1.22 | 0.002 |
| rs10886221             | 10 | 85123936  | T | C | none             | 0.240 | 0.318 | 1.30E-05 | 1.49 | 1.25 | 1.79 | 0.277 | 0.285 | 5.53E-01 | 1.05 | 0.90 | 1.21 | 1.93E-03 | 1.20 | 0.002 |
| rs7068676              | 10 | 85173709  | C | T | none             | 0.140 | 0.202 | 3.12E-05 | 1.58 | 1.27 | 1.95 | 0.161 | 0.155 | 6.27E-01 | 0.96 | 0.80 | 1.15 | 2.50E-02 | 1.17 | 0.000 |
| rs11198735             | 10 | 85193717  | A | C | none             | 0.099 | 0.156 | 3.25E-05 | 1.67 | 1.31 | 2.12 | 0.107 | 0.104 | 8.04E-01 | 0.97 | 0.78 | 1.21 | 1.19E-02 | 1.23 | 0.001 |
| rs11190842             | 10 | 102885447 | A | C | TLX1             | 0.125 | 0.090 | 1.18E-02 | 0.70 | 0.53 | 0.92 | 0.124 | 0.082 | 4.71E-04 | 0.65 | 0.51 | 0.83 | 2.67E-05 | 0.68 | 0.725 |
| rs9420843              | 10 | 103254177 | T | C | BTRC             | 0.490 | 0.498 | 8.48E-01 | 1.02 | 0.86 | 1.20 | 0.520 | 0.413 | 6.15E-05 | 0.76 | 0.66 | 0.87 | 1.91E-03 | 1.18 | 0.018 |
| rs4910793              | 11 | 5419637   | C | T | OR5111           | 0.047 | 0.091 | 2.27E-06 | 2.12 | 1.54 | 2.92 | 0.061 | 0.048 | 8.46E-02 | 0.76 | 0.56 | 1.04 | 3.77E-02 | 1.27 | 0.000 |
| rs541207               | 11 | 63881718  | G | T | none             | 0.404 | 0.359 | 1.74E-02 | 0.81 | 0.69 | 0.96 | 0.454 | 0.382 | 5.29E-05 | 0.75 | 0.65 | 0.86 | 5.40E-06 | 0.78 | 0.521 |
| rs538147               | 11 | 63886298  | A | G | RPS6KA4          | 0.356 | 0.291 | 1.01E-03 | 0.74 | 0.62 | 0.89 | 0.383 | 0.328 | 1.74E-03 | 0.79 | 0.69 | 0.92 | 7.72E-06 | 0.78 | 0.553 |
| rs645078               | 11 | 63891874  | C | A | RPS6KA4          | 0.354 | 0.291 | 1.26E-03 | 0.75 | 0.63 | 0.89 | 0.384 | 0.328 | 1.50E-03 | 0.79 | 0.68 | 0.91 | 7.70E-06 | 0.78 | 0.601 |
| rs670345               | 11 | 75123917  | A | G | none             | 0.059 | 0.074 | 1.31E-01 | 1.28 | 0.93 | 1.77 | 0.064 | 0.100 | 4.77E-05 | 1.62 | 1.28 | 2.05 | 1.91E-05 | 1.51 | 0.228 |
| rs3781730              | 11 | 75585731  | T | C | WNT11            | 0.156 | 0.219 | 2.07E-05 | 1.56 | 1.27 | 1.92 | 0.151 | 0.166 | 3.22E-01 | 1.10 | 0.91 | 1.32 | 2.89E-04 | 1.29 | 0.014 |
| rs4944640              | 11 | 86305653  | C | T | PRSS23           | 0.156 | 0.216 | 9.87E-05 | 1.52 | 1.23 | 1.87 | 0.186 | 0.166 | 1.64E-01 | 0.88 | 0.74 | 1.05 | 1.32E-01 | 1.11 | 0.000 |
| rs3858359              | 11 | 91148975  | G | T | none             | 0.109 | 0.120 | 3.37E-01 | 1.13 | 0.88 | 1.46 | 0.122 | 0.071 | 1.09E-05 | 0.56 | 0.43 | 0.72 | 1.91E-02 | 0.80 | 0.000 |
| rs11226664             | 11 | 104593463 | G | A | CARD17           | 0.361 | 0.358 | 9.58E-01 | 1.00 | 0.84 | 1.18 | 0.378 | 0.309 | 5.46E-05 | 0.74 | 0.64 | 0.86 | 1.70E-03 | 0.84 | 0.009 |
| rs1945975              | 11 | 104804934 | T | C | CARD17           | 0.362 | 0.369 | 6.27E-01 | 1.04 | 0.88 | 1.24 | 0.380 | 0.313 | 5.70E-05 | 0.74 | 0.64 | 0.86 | 6.26E-03 | 0.86 | 0.003 |
| rs598373               | 11 | 118169587 | T | C | DDX6             | 0.341 | 0.299 | 2.11E-02 | 0.81 | 0.68 | 0.97 | 0.344 | 0.283 | 2.42E-04 | 0.76 | 0.65 | 0.88 | 2.44E-05 | 0.78 | 0.582 |
| rs715412               | 11 | 118189820 | A | G | SET              | 0.190 | 0.158 | 4.86E-02 | 0.80 | 0.65 | 1.00 | 0.209 | 0.158 | 3.87E-04 | 0.72 | 0.60 | 0.86 | 8.04E-05 | 0.75 | 0.461 |
| rs10842549             | 12 | 25442292  | G | A | Hs.44647         | 0.384 | 0.475 | 3.45E-05 | 1.43 | 1.21 | 1.69 | 0.405 | 0.408 | 8.15E-01 | 1.02 | 0.89 | 1.17 | 6.69E-03 | 1.16 | 0.002 |
| rs2286025              | 12 | 46646251  | T | C | TMEM106C         | 0.084 | 0.094 | 2.93E-01 | 1.17 | 0.88 | 1.55 | 0.100 | 0.141 | 1.43E-04 | 1.47 | 1.20 | 1.79 | 8.62E-05 | 1.39 | 0.147 |
| rs3850022              | 12 | 102986504 | C | A | HCFC2            | 0.110 | 0.157 | 8.58E-05 | 1.61 | 1.27 | 2.04 | 0.160 | 0.149 | 5.09E-01 | 0.94 | 0.78 | 1.13 | 5.07E-02 | 1.16 | 0.001 |
| rs652157               | 13 | 101562517 | T | C | FGF14            | 0.482 | 0.481 | 6.34E-02 | 1.17 | 0.99 | 1.37 | 0.564 | 0.626 | 2.82E-04 | 1.29 | 1.49 | 1.13 | 6.38E-05 | 1.24 | 0.326 |
| rs2211312              | 13 | 107203928 | C | A | FAM155A          | 0.104 | 0.108 | 8.77E-01 | 1.02 | 0.78 | 1.33 | 0.124 | 0.071 | 8.49E-06 | 0.55 | 0.42 | 0.72 | 1.59E-03 | 0.74 | 0.001 |
| rs6573960              | 14 | 69926775  | C | T | SYNJ2BP          | 0.157 | 0.126 | 4.21E-02 | 0.78 | 0.61 | 0.99 | 0.134 | 0.087 | 6.01E-05 | 0.61 | 0.48 | 0.78 | 2.02E-05 | 0.69 | 0.150 |
|                        |    |           |   |   | C14orf73/TN      |       |       |          |      |      |      |       |       |          |      |      |      |          |      |       |
| rs8017161              | 14 | 102632948 | A | G | FAIP2            | 0.378 | 0.464 | 1.53E-05 | 1.44 | 1.22 | 1.69 | 0.399 | 0.446 | 4.23E-03 | 1.22 | 1.07 | 1.40 | 4.86E-07 | 1.31 | 0.152 |
| rs8024749              | 15 | 36173868  | A | G | none             | 0.137 | 0.117 | 1.24E-01 | 0.82 | 0.64 | 1.06 | 0.107 | 0.152 | 4.40E-05 | 1.50 | 1.23 | 1.82 | 1.94E-02 | 1.20 | 0.000 |
| rs7199670              | 16 | 22782739  | A | G | HSRST2           | 0.150 | 0.143 | 7.65E-01 | 0.97 | 0.77 | 1.22 | 0.112 | 0.071 | 6.62E-05 | 0.59 | 0.45 | 0.76 | 4.69E-03 | 0.78 | 0.005 |
| rs6564470              | 16 | 76356809  | G | A | none             | 0.443 | 0.383 | 2.79E-03 | 0.78 | 0.66 | 0.92 | 0.490 | 0.435 | 4.82E-03 | 0.82 | 0.72 | 0.94 | 3.36E-05 | 0.80 | 0.643 |
| rs8048451              | 16 | 76368220  | A | G | none             | 0.359 | 0.290 | 5.09E-04 | 0.73 | 0.61 | 0.87 | 0.412 | 0.366 | 1.15E-02 | 0.84 | 0.73 | 0.96 | 3.06E-05 | 0.79 | 0.264 |
| rs4888683              | 16 | 76373529  | C | T | none             | 0.346 | 0.291 | 5.51E-03 | 0.78 | 0.65 | 0.93 | 0.402 | 0.348 | 2.94E-03 | 0.81 | 0.70 | 0.93 | 4.48E-05 | 0.79 | 0.780 |
| rs11645428             | 16 | 79816397  | A | G | BCMO1/<br>PKD1L2 | 0.482 | 0.386 | 2.69E-06 | 0.67 | 0.57 | 0.80 | 0.353 | 0.342 | 3.44E-01 | 0.93 | 0.81 | 1.08 | 1.42E-04 | 0.81 | 0.004 |
| rs13290                | 17 | 7270356   | T | G | C17orf74         | 0.359 | 0.277 | 3.37E-05 | 0.69 | 0.57 | 0.82 | 0.356 | 0.362 | 7.87E-01 | 1.02 | 0.88 | 1.18 | 2.06E-02 | 0.88 | 0.001 |
| rs2302764              | 17 | 7300834   | C | T | CHRNB1           | 0.196 | 0.130 | 7.26E-05 | 0.63 | 0.50 | 0.79 | 0.161 | 0.163 | 9.98E-01 | 1.00 | 0.83 | 1.20 | 1.58E-02 | 0.84 | 0.002 |
| rs6503186              | 17 | 9032986   | C | T | NTN1             | 0.149 | 0.160 | 4.12E-01 | 1.10 | 0.88 | 1.38 | 0.117 | 0.167 | 4.76E-05 | 1.47 | 1.22 | 1.77 | 2.81E-04 | 1.30 | 0.052 |
| rs907092               | 17 | 35175785  | A | G | IKZF3            | 0.407 | 0.484 | 5.06E-05 | 1.40 | 1.19 | 1.65 | 0.459 | 0.469 | 1.70E-05 | 1.35 | 1.18 | 1.55 | 2.70E-09 | 1.37 | 0.744 |
| rs9303277              | 17 | 35229995  | T | C | IKZF3            | 0.451 | 0.532 | 4.01E-05 | 1.41 | 1.20 | 1.66 | 0.506 | 0.578 | 2.59E-05 | 1.34 | 1.54 | 1.17 | 1.69E-09 | 1.38 | 0.771 |
| rs11557467             | 17 | 35282160  | T | G | ZBPB2            | 0.439 | 0.477 | 2.99E-05 | 1.42 | 1.20 | 1.67 | 0.501 | 0.566 | 7.83E-05 | 1.32 | 1.51 | 1.15 | 5.84E-09 | 1.37 | 0.579 |
| rs2872507 <sup>b</sup> | 17 | 35294289  | A | G | ZBPB2            | 0.415 | 0.498 | 2.35E-05 | 1.42 | 1.21 | 1.68 | 0.454 | 0.474 | 1.89E-05 | 1.34 | 1.17 | 1.54 | 3.12E-09 | 1.37 | 0.627 |
| rs8067378              | 17 | 35304874  | G | A | GSDML            | 0.453 | 0.532 | 8.06E-05 | 1.39 | 1.18 | 1.63 | 0.505 | 0.571 | 7.45E-05 | 1.32 | 1.51 | 1.15 | 1.12E-08 | 1.36 | 0.728 |
| rs2305480              | 17 | 35315722  | A | G | ORMDL3           | 0.412 | 0.493 | 3.62E-05 | 1.41 | 1.20 | 1.66 | 0.449 | 0.482 | 3.55E-05 | 1.33 | 1.16 | 1.53 | 4.49E-09 | 1.37 | 0.625 |
| rs2290400              | 17 | 35319766  | C | T | ORMDL3           | 0.452 | 0.528 | 1.42E-04 | 1.37 | 1.17 | 1.62 | 0.500 | 0.565 | 1.13E-04 | 1.31 | 1.50 | 1.14 | 3.31E-08 | 1.34 | 0.748 |
| rs7216389              | 17 | 35323475  | C | T | ORMDL3           | 0.443 | 0.521 | 8.48E-05 | 1.39 | 1.18 | 1.63 | 0.504 | 0.563 | 2.85E-04 | 1.29 | 1.47 | 1.12 | 7.08E-08 | 1.33 | 0.548 |
| rs4795405              | 17 | 35341943  | T | C | ORMDL3           | 0.402 | 0.463 | 1.75E-03 | 1.30 | 1.10 | 1.53 | 0.435 | 0.492 | 5.47E-04 | 1.27 | 1.11 | 1.45 | 2.88E-06 | 1.28 | 0.847 |
| rs1007654              | 17 | 35364880  | A | G | GSDM1            | 0.395 | 0.431 | 4.85E-02 | 1.18 | 1.00 | 1.39 | 0.363 | 0.425 | 1.99E-04 | 1.30 | 1.13 | 1.49 | 3.84E-05 | 1.25 | 0.384 |
| rs3902025              | 17 | 35372780  | G | T | GSDM1            | 0.465 | 0.488 | 1.50E-02 | 1.22 | 1.04 | 1.44 | 0.426 | 0.481 | 1.78E-03 | 1.24 | 1.09 | 1.43 | 6.08E-05 | 1.24 | 0.852 |
| rs1617406              | 17 | 41140560  | G | A | LRRC37A          | 0.183 | 0.247 | 4.78E-05 | 1.49 | 1.23 | 1.82 | 0.180 | 0.154 | 4.79E-02 | 0.83 | 0.69 | 1.00 | 1.99E-01 | 1.09 | 0.000 |
| rs4792891              | 17 | 41329294  | G | T | MAPT             | 0.414 | 0.342 | 9.44E-05 | 0.71 | 0.60 | 0.85 | 0.339 | 0.331 | 5.26E-01 | 0.95 | 0.83 | 1.10 | 3.17E-03 | 0.85 | 0.010 |
| rs7220127              | 17 | 61976384  | C | T | PRKCA            | 0.484 | 0.401 | 1.66E-05 | 0.69 | 0.59 | 0.82 | 0.423 | 0.414 | 4.54E-01 | 0.95 | 0.83 | 1.09 | 7.15E-04 | 0.83 | 0.005 |
| rs9303778              | 18 | 12978783  | C | T | SEH1L            | 0.092 | 0.073 | 1.14E-01 | 0.78 | 0.58 | 1.06 | 0.068 | 0.103 | 8.09E-05 | 1.59 | 1.26 | 2.00 | 3.17E-02 | 1.22 | 0.000 |
| rs4043679              | 18 | 19907836  | T | G | TTC39C           | 0.376 | 0.433 | 1.08E-02 | 1.24 | 1.05 | 1.47 | 0.404 | 0.452 | 3.97E-03 | 1.22 | 1.07 | 1.40 | 8.20E-05 | 1.24 | 0.947 |
| rs8085148              | 18 | 19910288  | A | C | TTC39C           | 0.382 | 0.432 | 2.95E-02 | 1.20 | 1.02 | 1.42 | 0.401 | 0.454 | 1.94E-03 | 1.24 | 1.08 | 1.42 | 9.42E-05 | 1.23 | 0.694 |
| rs7230264              | 18 | 23181432  | A | G | FLJ45994         | 0.075 | 0.110 | 2.11E-03 | 1.54 | 1.17 | 2.03 | 0.108 | 0.139 | 3.78E-03 | 1.34 | 1.10 | 1.64 | 4.34E-05 | 1.40 | 0.408 |
| rs1474133              | 18 | 23234548  | G | A | FLJ45994         | 0.374 | 0.468 | 5.05E-06 | 1.47 | 1.25 | 1.74 | 0.445 | 0.439 | 9.97E-01 | 1.00 | 0.87 | 1.15 | 3.74E-03 | 1.17 | 0.000 |
| rs4274498              | 18 | 23249914  | A | G | Hs.201828        | 0.426 | 0.482 | 1.55E-05 | 1.44 | 1.22 | 1.69 | 0.491 | 0.482 | 8.18E-01 | 0.98 | 0.86 | 1.13 | 9.85E-03 | 1.15 | 0.001 |
| rs2879447              | 18 | 23256776  | C | T | Hs.201828        | 0.434 | 0.474 | 1.46E-05 | 1.44 | 1.22 | 1.69 | 0.497 | 0.500 | 6.62E-01 | 1.03 | 0.90 | 1.18 | 1.87E-03 | 1.18 | 0.002 |
| rs4447498              | 18 | 27037686  | T | C | DSC1             | 0.074 | 0.125 | 2.40E-05 | 1.77 | 1.35 | 2.32 | 0.076 | 0.079 | 7.75E-01 | 1.04 | 0.81 | 1.34 | 4.15E-03 | 1.31 | 0.003 |
| rs2063295              | 18 | 31264940  | T | C | none             | 0.422 | 0.362 | 1.22E-03 | 0.76 | 0.64 | 0.90 | 0.363 | 0.323 | 9.86E-03 | 0.83 | 0.72 | 0.96 | 6.36E-05 | 0.80 | 0.404 |
| rs4940235              | 18 | 48807971  | C | A | DCC              | 0.468 | 0.542 | 8.55E-05 | 1.39 | 1.18 | 1.64 | 0.464 | 0.481 | 3.75E-01 | 1.06 | 0.93 | 1.21 | 1.32E-03 | 1.19 | 0.015 |

|           |    |          |   |   |                  |       |       |          |      |      |      |       |       |          |      |      |      |          |      |       |
|-----------|----|----------|---|---|------------------|-------|-------|----------|------|------|------|-------|-------|----------|------|------|------|----------|------|-------|
| rs4077090 | 18 | 52992869 | C | T | <i>none</i>      | 0.231 | 0.240 | 5.35E-01 | 1.06 | 0.88 | 1.29 | 0.268 | 0.332 | 1.81E-05 | 1.37 | 1.19 | 1.59 | 1.19E-04 | 1.26 | 0.034 |
| rs1009081 | 18 | 53073827 | T | C | <i>none</i>      | 0.196 | 0.192 | 8.42E-01 | 0.98 | 0.80 | 1.20 | 0.227 | 0.289 | 1.74E-05 | 1.39 | 1.20 | 1.62 | 7.13E-04 | 1.23 | 0.007 |
| rs4808419 | 19 | 15961918 | G | A | <i>none</i>      | 0.474 | 0.475 | 9.45E-01 | 0.99 | 0.84 | 1.17 | 0.511 | 0.435 | 2.96E-05 | 1.34 | 1.17 | 1.54 | 1.24E-03 | 1.19 | 0.004 |
| rs2279144 | 19 | 43893621 | T | C | <i>ACTN4</i>     | 0.414 | 0.327 | 2.30E-05 | 0.69 | 0.58 | 0.82 | 0.467 | 0.476 | 4.54E-01 | 1.05 | 0.92 | 1.21 | 5.64E-02 | 0.90 | 0.000 |
| rs8107416 | 19 | 43929790 | A | C | <i>ACTN4</i>     | 0.417 | 0.328 | 2.31E-05 | 0.69 | 0.58 | 0.82 | 0.477 | 0.478 | 7.24E-01 | 1.03 | 0.89 | 1.18 | 2.77E-02 | 0.89 | 0.000 |
| rs3745516 | 19 | 55618554 | A | G | <i>SPIB</i>      | 0.272 | 0.357 | 1.41E-05 | 1.47 | 1.24 | 1.75 | 0.231 | 0.307 | 8.88E-07 | 1.45 | 1.25 | 1.68 | 7.97E-11 | 1.46 | 0.875 |
| rs3810276 | 19 | 55626751 | A | G | <i>SPIB</i>      | 0.463 | 0.480 | 4.01E-03 | 1.27 | 1.08 | 1.50 | 0.414 | 0.471 | 2.06E-03 | 1.24 | 1.08 | 1.42 | 1.86E-05 | 1.26 | 0.866 |
| rs6140113 | 20 | 691770   | T | C | <i>C20orf54</i>  | 0.174 | 0.167 | 6.74E-01 | 0.95 | 0.77 | 1.19 | 0.164 | 0.108 | 2.10E-05 | 0.62 | 0.50 | 0.77 | 7.20E-04 | 0.76 | 0.004 |
| rs2180368 | 20 | 987828   | C | T | <i>none</i>      | 0.303 | 0.379 | 6.53E-05 | 1.41 | 1.19 | 1.68 | 0.280 | 0.291 | 7.31E-01 | 1.03 | 0.88 | 1.19 | 5.62E-03 | 1.17 | 0.004 |
| rs5999665 | 22 | 33715028 | C | T | <i>Hs.589934</i> | 0.480 | 0.401 | 2.01E-05 | 0.70 | 0.59 | 0.82 | 0.466 | 0.473 | 7.20E-01 | 1.03 | 0.90 | 1.17 | 1.54E-02 | 0.88 | 0.001 |
| rs739363  | 22 | 38090829 | A | C | <i>SYNGR1</i>    | 0.263 | 0.324 | 2.56E-04 | 1.39 | 1.17 | 1.66 | 0.296 | 0.329 | 2.14E-02 | 1.19 | 1.03 | 1.37 | 5.25E-05 | 1.26 | 0.156 |
| rs2879246 | 22 | 47188783 | C | T | <i>none</i>      | 0.143 | 0.201 | 8.61E-05 | 1.53 | 1.24 | 1.89 | 0.188 | 0.192 | 6.11E-01 | 1.05 | 0.88 | 1.24 | 4.72E-03 | 1.21 | 0.006 |

a. SNPs with modest ( $p < 1E-04$ ) or stronger evidence of association in the Italian PBC, and/or Canadian PBC and/or the meta-analysis are presented. Allele 1 is the minor allele for the positive strand in the Italian population.

b. For these SNPs the combined data that included Canadian PBC and control data were based partially on imputation.

### Supplementary Table 3 Analysis of *IL12A/SCHIP1* SNPs

#### Stepwise Logistic Regression<sup>a</sup>

| SNP        | BP        | p value |
|------------|-----------|---------|
| rs6441284  | 161200962 | 5.0E-10 |
| rs17811014 | 161170723 | 1.5E-05 |
| rs583911   | 161193084 | 1.2E-05 |
| rs1075498  | 161239145 | 5.9E-03 |
| rs924247   | 160963022 | 2.9E-02 |

#### Haplotype Association Tests<sup>b</sup>

| Haplotypes | OR    | p value |
|------------|-------|---------|
| GGAAA      | 0.58  | 3.5E-07 |
| AGGCG      | 1.34  | 9.8E-05 |
| AAACG      | 1.88  | 4.5E-08 |
| GGAAG      | 0.58  | 8.4E-07 |
| GGACA      | 0.311 | 1.7E-02 |
| AGAAA      | 0.67  | 2.2E-02 |
| GGGCG      | 1.19  | 4.8E-02 |
| AGGAG      | 1.35  | 1.3E-02 |
| AGAAG      | 0.72  | 1.1E-02 |

a. Results of stepwise logistic regression using combined PBC dataset. Conditionally independent results were observed with each of the listed SNPs. These analyses were performed using the combined Italian and Canadian datasets. For these SNPs there was no heterogeneity observed in the separate analyses [Cochran's Q test p values >0.1 (**Supplementary Table 2**)]

b. Haplotypes showing nominally significant results are shown for the SNPs identified in the setwise logistic regression. The first 4 haplotypes were strongly associated with PBC risk. The order of the SNPs is rs924247, rs17811014, rs583911, rs6441286, and rs107548.

**Supplementary Table 4. Comparison of Meta-Analyses containing all PBC Cases and AMA only Cases<sup>a</sup>**

| SNP        | CHR | BP        | Minor Allele | META p   | META OR | AMA p    | AMA OR |
|------------|-----|-----------|--------------|----------|---------|----------|--------|
| rs4908830  | 1   | 9220458   | G            | 7.61E-04 | 0.8063  | 8.71E-05 | 0.7492 |
| rs3790565  | 1   | 67583944  | C            | 4.46E-09 | 1.4358  | 1.00E-08 | 1.4796 |
| rs3790567  | 1   | 67594965  | A            | 7.53E-12 | 1.4753  | 2.96E-10 | 1.4921 |
| rs4297265  | 1   | 67624923  | G            | 5.42E-05 | 1.2404  | 8.52E-04 | 1.2218 |
| rs2270614  | 1   | 67628609  | A            | 3.44E-05 | 1.2471  | 5.68E-04 | 1.2298 |
| rs7546194  | 1   | 81643352  | A            | 4.31E-03 | 0.8579  | 5.55E-05 | 0.7868 |
| rs4636400  | 1   | 144155913 | G            | 8.08E-05 | 0.8007  | 1.01E-04 | 0.7842 |
| rs1105749  | 2   | 4272264   | G            | 4.09E-04 | 1.2553  | 9.74E-05 | 1.3234 |
| rs6741449  | 2   | 70010093  | G            | 1.34E-03 | 1.189   | 7.04E-05 | 1.2722 |
| rs7569076  | 2   | 88554147  | T            | 1.41E-05 | 1.2965  | 4.72E-03 | 1.209  |
| rs3769811  | 2   | 182745334 | T            | 8.75E-05 | 0.7469  | 3.25E-04 | 0.7379 |
| rs7601754  | 2   | 191648696 | G            | 1.34E-05 | 0.731   | 7.11E-05 | 0.7271 |
| rs6752770  | 2   | 191681808 | G            | 6.15E-05 | 1.2572  | 1.50E-04 | 1.2697 |
| rs6437268  | 2   | 240649535 | C            | 2.09E-05 | 0.7828  | 1.44E-05 | 0.7545 |
| rs2887401  | 2   | 240685626 | A            | 9.63E-05 | 0.78    | 1.04E-03 | 0.7923 |
| rs4686174  | 3   | 7894746   | T            | 9.96E-05 | 1.2548  | 8.36E-05 | 1.2882 |
| rs6797331  | 3   | 7915671   | T            | 4.62E-05 | 1.2671  | 4.46E-05 | 1.2988 |
| rs1372072  | 3   | 16930263  | A            | 1.52E-05 | 1.2671  | 1.19E-02 | 1.1664 |
| rs9876137  | 3   | 16936269  | G            | 1.42E-05 | 1.2681  | 1.14E-02 | 1.1675 |
| rs1025818  | 3   | 16940025  | C            | 9.49E-06 | 1.2753  | 1.63E-03 | 1.2142 |
| rs4618210  | 3   | 17099388  | G            | 3.78E-05 | 1.2463  | 1.15E-02 | 1.1615 |
| rs1394761  | 3   | 24390831  | A            | 7.56E-05 | 0.7927  | 4.23E-05 | 0.7584 |
| rs1304138  | 3   | 39979370  | A            | 1.38E-03 | 1.1885  | 5.67E-05 | 1.2768 |
| rs1585287  | 3   | 39989394  | A            | 3.58E-03 | 1.1683  | 4.64E-05 | 1.2767 |
| rs13078855 | 3   | 120589967 | T            | 9.50E-06 | 0.7201  | 2.20E-04 | 0.7349 |
| rs1132200  | 3   | 120633526 | T            | 3.87E-07 | 0.6723  | 4.36E-06 | 0.6663 |
| rs2293370  | 3   | 120702624 | A            | 3.03E-07 | 0.6847  | 6.82E-06 | 0.6878 |
| rs6804441  | 3   | 120743634 | G            | 4.48E-05 | 0.7365  | 3.91E-04 | 0.7418 |
| rs4680514  | 3   | 160944150 | A            | 7.94E-05 | 0.7599  | 8.53E-04 | 0.7725 |
| rs1461100  | 3   | 160945597 | A            | 7.28E-05 | 0.755   | 1.24E-03 | 0.7756 |
| rs3863075  | 3   | 160985457 | C            | 3.05E-06 | 0.7562  | 3.06E-07 | 0.7069 |
| rs7636819  | 3   | 160988297 | G            | 4.31E-06 | 0.7596  | 4.54E-07 | 0.711  |
| rs6441276  | 3   | 161034716 | T            | 1.16E-05 | 0.7386  | 6.72E-06 | 0.7027 |
| rs33055    | 3   | 161086908 | C            | 1.18E-04 | 1.2394  | 6.72E-05 | 1.2802 |
| rs26298    | 3   | 161093985 | G            | 1.65E-06 | 0.764   | 3.59E-07 | 0.7242 |
| rs17811014 | 3   | 161170723 | T            | 2.32E-05 | 1.3272  | 9.59E-04 | 1.2804 |
| rs2243123  | 3   | 161192345 | C            | 4.57E-07 | 0.7219  | 1.51E-06 | 0.7013 |
| rs583911   | 3   | 161193084 | G            | 1.41E-07 | 1.3242  | 1.67E-07 | 1.3719 |
| rs6441284  | 3   | 161200962 | G            | 2.91E-07 | 0.7482  | 1.17E-05 | 0.7555 |

|            |   |           |   |          |        |          |        |
|------------|---|-----------|---|----------|--------|----------|--------|
| rs485497   | 3 | 161201826 | G | 3.15E-06 | 0.7778 | 6.87E-06 | 0.7602 |
| rs6441286  | 3 | 161211572 | G | 7.63E-12 | 1.4415 | 2.10E-08 | 1.395  |
| rs574808   | 3 | 161215677 | C | 3.30E-10 | 0.698  | 9.10E-09 | 0.6877 |
| rs10513549 | 3 | 161237201 | A | 5.93E-05 | 0.772  | 4.56E-04 | 0.774  |
| rs1075498  | 3 | 161239145 | A | 6.54E-08 | 0.7113 | 2.78E-06 | 0.7157 |
| rs4679904  | 3 | 161823590 | T | 5.31E-05 | 0.7688 | 2.88E-03 | 0.8071 |
| rs7678820  | 4 | 22901080  | C | 1.33E-05 | 0.7138 | 6.55E-05 | 0.7068 |
| rs1912031  | 4 | 22938137  | A | 8.31E-05 | 0.7449 | 2.27E-03 | 0.7786 |
| rs7665090  | 4 | 103770651 | A | 3.47E-05 | 0.8012 | 3.19E-05 | 0.7793 |
| rs2866413  | 4 | 103776125 | G | 4.11E-05 | 0.8027 | 3.95E-05 | 0.7816 |
| rs228611   | 4 | 103780757 | A | 5.44E-05 | 0.805  | 7.69E-05 | 0.788  |
| rs228614   | 4 | 103797685 | A | 2.19E-05 | 0.7965 | 4.20E-05 | 0.7806 |
| rs223420   | 4 | 103947120 | A | 7.66E-05 | 1.2346 | 2.25E-03 | 1.2007 |
| rs4698874  | 4 | 104149960 | C | 5.83E-05 | 1.2387 | 1.14E-03 | 1.2145 |
| rs10516496 | 4 | 104161614 | T | 8.98E-05 | 1.2405 | 2.92E-03 | 1.1987 |
| rs11946020 | 4 | 104164191 | C | 8.47E-05 | 1.2411 | 2.22E-03 | 1.2042 |
| rs1358229  | 4 | 123116184 | T | 6.24E-06 | 1.2724 | 1.25E-05 | 1.2959 |
| rs6838639  | 4 | 123118615 | A | 6.63E-06 | 0.7443 | 4.45E-04 | 0.7742 |
| rs13144383 | 4 | 139310254 | G | 6.21E-05 | 1.317  | 1.20E-06 | 1.4519 |
| rs954017   | 5 | 40066770  | A | 6.85E-04 | 1.3605 | 4.77E-05 | 1.4956 |
| rs2395488  | 6 | 31553888  | G | 9.35E-05 | 1.2391 | 1.97E-03 | 1.2065 |
| rs2523647  | 6 | 31557757  | G | 3.72E-05 | 1.2815 | 4.83E-03 | 1.2072 |
| rs2269475  | 6 | 31691910  | T | 5.56E-07 | 1.4898 | 1.70E-05 | 1.4808 |
| rs1046089  | 6 | 31710946  | A | 3.13E-06 | 1.2989 | 4.34E-06 | 1.3339 |
| rs805303   | 6 | 31724345  | A | 4.81E-05 | 1.2505 | 3.81E-05 | 1.2862 |
| rs3130617  | 6 | 31735502  | C | 2.76E-05 | 0.7508 | 1.06E-03 | 0.7767 |
| rs2280800  | 6 | 31754377  | A | 2.52E-07 | 1.5002 | 1.25E-05 | 1.4857 |
| rs805274   | 6 | 31773173  | C | 4.03E-06 | 1.3066 | 3.37E-05 | 1.303  |
| rs2242653  | 6 | 31783744  | A | 6.41E-08 | 1.4873 | 1.67E-06 | 1.4966 |
| rs805294   | 6 | 31796196  | G | 1.37E-04 | 1.2326 | 3.95E-05 | 1.2838 |
| rs2227956  | 6 | 31886251  | G | 2.47E-05 | 0.6981 | 4.21E-05 | 0.6636 |
| rs2763979  | 6 | 31902571  | T | 6.86E-06 | 1.2812 | 2.36E-05 | 1.296  |
| rs9267649  | 6 | 31932807  | A | 9.33E-06 | 0.6862 | 1.21E-05 | 0.645  |
| rs3134954  | 6 | 32179871  | C | 1.06E-05 | 0.6525 | 1.25E-04 | 0.6491 |
| rs2269425  | 6 | 32231617  | A | 4.06E-07 | 1.4708 | 1.54E-05 | 1.4448 |
| rs3134603  | 6 | 32233980  | A | 3.30E-06 | 0.6396 | 4.49E-05 | 0.6352 |
| rs3134943  | 6 | 32255739  | T | 1.70E-07 | 0.5912 | 1.52E-06 | 0.5642 |
| rs3132946  | 6 | 32298006  | A | 1.33E-06 | 0.6045 | 1.33E-05 | 0.5842 |
| rs411326   | 6 | 32319295  | T | 6.96E-06 | 1.3046 | 2.66E-04 | 1.2747 |
| rs9267992  | 6 | 32328375  | G | 2.36E-05 | 0.6588 | 1.89E-04 | 0.6491 |
| rs2076537  | 6 | 32425613  | A | 6.37E-06 | 1.2817 | 2.53E-05 | 1.2982 |
| rs2395148  | 6 | 32429532  | T | 9.95E-15 | 2.7547 | 1.54E-11 | 2.7113 |
| rs6907322  | 6 | 32432923  | A | 1.27E-12 | 1.5523 | 1.01E-09 | 1.541  |
| rs2395150  | 6 | 32434023  | G | 1.23E-05 | 1.264  | 6.10E-05 | 1.2775 |

|           |   |          |   |          |        |          |        |
|-----------|---|----------|---|----------|--------|----------|--------|
| rs2073048 | 6 | 32443411 | A | 1.74E-08 | 1.5049 | 3.59E-06 | 1.4531 |
| rs4424066 | 6 | 32462406 | G | 1.71E-05 | 1.2616 | 1.11E-04 | 1.2615 |
| rs3117098 | 6 | 32466491 | G | 8.88E-08 | 0.7287 | 2.51E-08 | 0.6897 |
| rs4248166 | 6 | 32474399 | C | 3.47E-09 | 1.4937 | 1.31E-07 | 1.4951 |
| rs3763305 | 6 | 32477466 | A | 9.11E-06 | 1.6844 | 1.12E-05 | 1.7923 |
| rs3806156 | 6 | 32481676 | T | 1.74E-10 | 1.4153 | 8.29E-09 | 1.4215 |
| rs3763313 | 6 | 32484449 | C | 4.24E-09 | 1.4555 | 4.75E-07 | 1.4322 |
| rs2395163 | 6 | 32495787 | C | 2.99E-06 | 1.3556 | 2.15E-05 | 1.3712 |
| rs3135363 | 6 | 32497626 | G | 2.00E-13 | 0.6351 | 1.34E-12 | 0.6103 |
| rs9501626 | 6 | 32508322 | A | 4.72E-09 | 1.5582 | 2.73E-08 | 1.6001 |
| rs2395175 | 6 | 32513004 | A | 2.11E-05 | 1.395  | 9.26E-04 | 1.3559 |
| rs6903608 | 6 | 32536263 | C | 4.96E-07 | 0.7467 | 7.22E-08 | 0.7045 |
| rs660895  | 6 | 32685358 | G | 1.14E-16 | 1.7273 | 1.13E-13 | 1.7497 |
| rs3129763 | 6 | 32698903 | A | 2.16E-08 | 0.7014 | 1.17E-08 | 0.6671 |
| rs9275184 | 6 | 32762692 | C | 1.40E-06 | 1.5164 | 4.93E-05 | 1.4815 |
| rs7775228 | 6 | 32766057 | C | 9.74E-11 | 1.564  | 8.31E-10 | 1.5857 |
| rs9357152 | 6 | 32772938 | G | 4.24E-11 | 0.6625 | 1.78E-12 | 0.6074 |
| rs9275312 | 6 | 32773706 | G | 2.14E-20 | 1.9407 | 1.17E-16 | 1.9482 |
| rs9275390 | 6 | 32777134 | C | 3.31E-21 | 1.744  | 2.49E-17 | 1.7463 |
| rs2647050 | 6 | 32777745 | C | 2.58E-08 | 0.7333 | 3.32E-09 | 0.6896 |
| rs2856718 | 6 | 32778233 | T | 1.53E-08 | 0.7291 | 1.83E-09 | 0.6844 |
| rs7745656 | 6 | 32788948 | T | 4.01E-05 | 0.7893 | 1.37E-06 | 0.7308 |
| rs9276644 | 6 | 32853021 | C | 6.52E-05 | 0.7976 | 2.01E-04 | 0.7908 |
| rs2219893 | 6 | 32877641 | C | 7.41E-06 | 1.2813 | 1.33E-04 | 1.2696 |
| rs3129299 | 6 | 33008765 | T | 6.56E-05 | 1.2966 | 3.31E-05 | 1.3504 |
| rs2395296 | 6 | 33019792 | A | 9.78E-05 | 0.7905 | 2.03E-03 | 0.8134 |
| rs194682  | 6 | 33022591 | T | 6.11E-05 | 1.2454 | 5.53E-03 | 1.1878 |
| rs209473  | 6 | 33030886 | A | 3.77E-05 | 0.8005 | 4.41E-04 | 0.8074 |
| rs209474  | 6 | 33032562 | G | 4.58E-05 | 1.2454 | 1.16E-03 | 1.2177 |
| rs423639  | 6 | 33095752 | T | 1.70E-04 | 1.3843 | 2.39E-05 | 1.4851 |
| rs9277535 | 6 | 33162839 | G | 1.95E-12 | 1.5046 | 4.90E-12 | 1.5773 |
| rs9277554 | 6 | 33163516 | T | 6.10E-09 | 1.3877 | 2.71E-09 | 1.4604 |
| rs9277565 | 6 | 33164875 | T | 2.62E-11 | 1.5025 | 6.17E-11 | 1.5725 |
| rs2281389 | 6 | 33167774 | G | 6.44E-12 | 1.5514 | 7.93E-11 | 1.5988 |
| rs3128917 | 6 | 33167974 | G | 5.28E-08 | 1.3753 | 2.37E-08 | 1.4454 |
| rs3117222 | 6 | 33168927 | T | 5.73E-08 | 1.3741 | 2.54E-08 | 1.4443 |
| rs2064478 | 6 | 33180244 | T | 5.08E-08 | 1.3898 | 5.44E-08 | 1.446  |
| rs3130215 | 6 | 33182941 | A | 1.00E-04 | 0.8027 | 8.96E-05 | 0.7788 |
| rs3117230 | 6 | 33183613 | G | 6.52E-08 | 1.387  | 7.01E-08 | 1.4419 |
| rs3117016 | 6 | 33203494 | A | 1.64E-05 | 1.2598 | 2.16E-04 | 1.2475 |
| rs6901221 | 6 | 33206254 | C | 2.15E-09 | 1.5112 | 2.33E-07 | 1.5027 |
| rs2855430 | 6 | 33249258 | A | 9.65E-09 | 1.5253 | 4.51E-07 | 1.5321 |
| rs2855459 | 6 | 33262634 | A | 1.02E-08 | 1.5268 | 4.53E-07 | 1.5344 |
| rs439205  | 6 | 33281820 | A | 3.10E-07 | 1.353  | 5.28E-06 | 1.3554 |

|            |    |           |   |          |        |          |        |
|------------|----|-----------|---|----------|--------|----------|--------|
| rs421446   | 6  | 33282761  | G | 9.06E-08 | 1.3543 | 4.43E-06 | 1.3393 |
| rs9371462  | 6  | 150910792 | G | 1.44E-04 | 1.2517 | 7.41E-05 | 1.2946 |
| rs10250643 | 7  | 24502175  | G | 1.25E-05 | 0.7523 | 6.14E-05 | 0.7451 |
| rs2255365  | 7  | 24528186  | C | 9.23E-05 | 0.8098 | 1.56E-03 | 0.8273 |
| rs917017   | 7  | 43331539  | G | 1.65E-04 | 1.2228 | 9.79E-05 | 1.2615 |
| rs4728142  | 7  | 128361203 | A | 5.97E-05 | 1.2386 | 2.03E-03 | 1.2015 |
| rs10488631 | 7  | 128381419 | C | 2.78E-10 | 1.634  | 3.51E-07 | 1.5606 |
| rs11784810 | 8  | 24482929  | G | 7.16E-05 | 1.2387 | 9.05E-03 | 1.1701 |
| rs12678383 | 8  | 24498107  | T | 7.50E-05 | 1.2625 | 1.51E-03 | 1.2317 |
| rs7813101  | 8  | 97733748  | A | 2.43E-05 | 1.2744 | 2.38E-04 | 1.2706 |
| rs1529335  | 8  | 129085529 | T | 2.12E-05 | 0.7004 | 1.06E-03 | 0.7333 |
| rs895236   | 9  | 4028228   | T | 5.83E-05 | 0.6932 | 4.44E-03 | 0.7547 |
| rs1529952  | 9  | 85909367  | T | 1.64E-05 | 1.2684 | 3.60E-05 | 1.2915 |
| rs3124607  | 9  | 138534660 | A | 7.93E-05 | 0.7901 | 1.02E-03 | 0.8009 |
| rs10993994 | 10 | 51219502  | T | 2.92E-05 | 1.2513 | 9.50E-04 | 1.22   |
| rs11596067 | 10 | 62688994  | T | 1.38E-03 | 1.268  | 4.15E-05 | 1.3974 |
| rs7084300  | 10 | 62703010  | C | 1.48E-03 | 1.2658 | 4.20E-05 | 1.3949 |
| rs12781461 | 10 | 82915023  | T | 9.41E-06 | 1.2778 | 2.20E-04 | 1.2598 |
| rs11190842 | 10 | 102885447 | A | 2.67E-05 | 0.6769 | 1.05E-03 | 0.7134 |
| rs7911360  | 10 | 122795537 | A | 1.08E-04 | 0.8034 | 7.66E-05 | 0.7796 |
| rs1562902  | 11 | 14874792  | C | 9.72E-03 | 0.868  | 6.69E-05 | 0.7797 |
| rs541207   | 11 | 63881718  | G | 5.40E-06 | 0.7783 | 3.18E-04 | 0.7993 |
| rs538147   | 11 | 63886298  | A | 7.72E-06 | 0.7753 | 2.41E-04 | 0.7902 |
| rs645078   | 11 | 63891874  | C | 7.70E-06 | 0.775  | 2.58E-04 | 0.7907 |
| rs670345   | 11 | 75123917  | A | 1.91E-05 | 1.5088 | 2.92E-03 | 1.3824 |
| rs598373   | 11 | 118169587 | T | 2.44E-05 | 0.7828 | 2.25E-04 | 0.7887 |
| rs715412   | 11 | 118189820 | A | 8.04E-05 | 0.7541 | 8.78E-04 | 0.7663 |
| rs2286025  | 12 | 46646251  | T | 8.62E-05 | 1.3881 | 1.98E-03 | 1.3347 |
| rs3184504  | 12 | 110368991 | C | 1.53E-04 | 0.816  | 1.15E-05 | 0.7695 |
| rs653178   | 12 | 110492139 | T | 1.68E-04 | 0.8175 | 9.46E-06 | 0.7677 |
| rs11066320 | 12 | 111390798 | A | 1.19E-03 | 1.1889 | 8.83E-05 | 1.2625 |
| rs3783316  | 14 | 34406943  | A | 1.46E-04 | 1.2314 | 7.80E-05 | 1.2717 |
| rs6573960  | 14 | 69926775  | C | 2.02E-05 | 0.6896 | 6.13E-04 | 0.7258 |
| rs8017161  | 14 | 102632948 | A | 4.86E-07 | 1.3101 | 3.97E-06 | 1.3225 |
| rs1097863  | 16 | 10234830  | G | 2.65E-03 | 1.2306 | 2.90E-05 | 1.3673 |
| rs1035089  | 16 | 10955851  | A | 5.13E-03 | 1.1612 | 8.13E-05 | 1.2632 |
| rs8059260  | 16 | 10967652  | G | 5.07E-03 | 0.8086 | 3.12E-05 | 0.6907 |
| rs2302558  | 16 | 10970512  | T | 8.34E-04 | 0.7591 | 9.71E-06 | 0.6528 |
| rs8055893  | 16 | 10979296  | T | 7.92E-04 | 0.7553 | 2.26E-05 | 0.6601 |
| rs9940096  | 16 | 11047095  | G | 5.20E-04 | 0.7462 | 2.87E-05 | 0.6624 |
| rs741176   | 16 | 11053311  | G | 3.64E-04 | 0.7401 | 2.77E-05 | 0.6632 |
| rs1345879  | 16 | 11312263  | T | 1.08E-03 | 1.2055 | 2.82E-05 | 1.3042 |
| rs7186179  | 16 | 56265333  | A | 1.52E-03 | 1.2636 | 7.92E-05 | 1.3776 |
| rs6564470  | 16 | 76356809  | G | 3.36E-05 | 0.7995 | 1.38E-03 | 0.8264 |

|            |    |          |   |          |        |          |        |
|------------|----|----------|---|----------|--------|----------|--------|
| rs8048451  | 16 | 76368220 | A | 3.06E-05 | 0.7917 | 7.13E-04 | 0.8106 |
| rs4888683  | 16 | 76373529 | C | 4.48E-05 | 0.7944 | 1.35E-03 | 0.8186 |
| rs11645428 | 16 | 79816397 | A | 1.42E-04 | 0.8105 | 9.10E-05 | 0.7821 |
| rs907092   | 17 | 35175785 | A | 2.70E-09 | 1.3737 | 4.08E-08 | 1.391  |
| rs2305480  | 17 | 35315722 | A | 4.49E-09 | 1.3673 | 1.02E-07 | 1.3771 |
| rs4795405  | 17 | 35341943 | T | 2.88E-06 | 1.2839 | 1.40E-05 | 1.3004 |
| rs1007654  | 17 | 35364880 | A | 3.84E-05 | 1.2483 | 1.75E-04 | 1.255  |
| rs3902025  | 17 | 35372780 | G | 6.08E-05 | 1.2377 | 6.48E-04 | 1.2272 |
| rs10515129 | 17 | 51932026 | G | 9.17E-04 | 1.3239 | 2.65E-05 | 1.4786 |
| rs4043679  | 18 | 19907836 | T | 8.20E-05 | 1.2356 | 2.00E-05 | 1.2921 |
| rs8085148  | 18 | 19910288 | A | 9.42E-05 | 1.2334 | 3.56E-05 | 1.2752 |
| rs1487435  | 18 | 19911764 | T | 1.07E-04 | 1.2302 | 6.82E-05 | 1.2684 |
| rs7230264  | 18 | 23181432 | A | 4.34E-05 | 1.3997 | 6.67E-04 | 1.377  |
| rs2063295  | 18 | 31264940 | T | 6.36E-05 | 0.7995 | 1.82E-03 | 0.8231 |
| rs4077090  | 18 | 52992869 | C | 1.19E-04 | 1.2551 | 6.76E-05 | 1.3015 |
| rs3745516  | 19 | 55618554 | A | 7.97E-11 | 1.4562 | 2.87E-08 | 1.4311 |
| rs3810276  | 19 | 55626751 | A | 1.86E-05 | 1.2564 | 2.79E-04 | 1.2397 |
| rs739363   | 22 | 38090829 | A | 5.25E-05 | 1.2605 | 1.33E-03 | 1.2253 |

a Results from the combined meta-analysis of ITN and Canadian datasets for all (959) or only AMA positive (701) PBC cases. All p values (<10<sup>-4</sup>) for either analyses are shown.



**Supplementary Table 5. Comparison of PBC and Celiac Association for *SCHIP1/IL12A* Region**

|            |           | minor allele | PBC <sup>a</sup> |                 | Celiac UKGWAS <sup>b</sup> |      | Celiac CMH Overall |      | Celiac Italian Study <sup>c</sup> |      |
|------------|-----------|--------------|------------------|-----------------|----------------------------|------|--------------------|------|-----------------------------------|------|
|            |           |              | P value          | OR <sup>d</sup> | P value                    | OR   | P value            | OR   | P value                           | OR   |
| rs10513546 | 161034345 | A            | 1.04E-03         | 1.20            | 1.20E-03                   | 0.80 | 7.49E-02           | 0.93 | NA                                | NA   |
| rs6441276  | 161034716 | T            | 1.16E-05         | 0.74            | NA                         | NA   | NA                 | NA   | NA                                | NA   |
| rs13088856 | 161037652 | G            | 1.18E-03         | 1.20            | 1.13E-03                   | 0.79 | 7.27E-02           | 0.93 | NA                                | NA   |
| rs17810546 | 161147744 | G            | 2.76E-02         | 0.90            | 3.39E-04                   | 1.38 | 1.07E-09           | 1.35 | 4.00E-04                          | 1.71 |
| rs9811792  | 161179692 | C            | 3.30E-02         | 0.89            | 2.78E-03                   | 1.21 | 5.24E-08           | 1.21 | 3.13E-02                          | 1.21 |
| rs583911   | 161193084 | G            | 1.41E-07         | 1.32            | NA                         | NA   | NA                 | NA   | NA                                | NA   |
| rs6441286  | 161211572 | G            | 7.63E-12         | 1.44            | NA                         | NA   | NA                 | NA   | NA                                | NA   |

a. Results from analyses in the current study.

b. Results from Hunt, K.A. et al. Nat Genet 40, 395-402 (2008).

c. Results from Romanos, J. et al. J Med Genet 46, 60-3 (2009).

d. OR provided for minor allele in forward direction for all studies.

## **Supplementary Methods for Meta-analyses of Italian and Canadian Genome-Wide Association Screens Identify Multiple Loci Associated with Primary Biliary Cirrhosis**

### **Subjects.**

All PBC cases included in these studies met internationally accepted and American Association for the Study of Liver Diseases criteria for PBC<sup>1</sup>, including a cholestatic pattern of serum biochemistry for >6 months and liver histology compatible with or diagnostic of PBC. Most individuals (see below) were positive for serum anti-mitochondrial antibodies (AMA) (titers of  $\geq 1:40$  by indirect immunofluorescence), but AMA positivity was not used as a criterion for case inclusion in view of previous data suggesting no effect of AMA status on the profile of disease-associated loci<sup>2</sup>.

All cases and controls were obtained using IRB approved protocols at each institution or were obtained from genotype databases with appropriate approval. PBC Italian cases were collected from multiple centers in Italy including Milano, Bologna, Padova, Torino, Napoli, Pisa, Udine, Cuneo, Roma, Firenze, Genova, Bari, and Palermo. Of a total of 524 cases, 453 cases were included in the association testing after quality control (95% complete genotyping data), cryptic relationship analyses ( $PI^{\wedge} < 0.1$ ), and ancestry analysis (**Supplementary Table 1**). The cases were genotyped using the Illumina 610K platform at the Feinberg Institute. The Italian PBC cases were 90.3% female, 85.4% AMA positive, mean age of 55.2 years, 39.6 % were ANA positive and 31.7% had liver cirrhosis. The Canadian PBC cases were as previously described<sup>2</sup> and included 506 cases of European ancestry (see Ancestry).

The control genotypes were derived from multiple sources after quality control and selection for by ancestry criteria as detailed in **Supplementary Table 1**. For the Italian (phase 1 of this study) these include: 1) 637 normal controls collected in Italy

genotyped using Illumina 1Mb platform at the University of Milan; 2) 6 samples from the British Blood Bank 1958 cohort genotyped at the Sanger Institute using Illumina 550K platform; 3) 159 subjects from the New York Cancer Project (NYCP)<sup>3</sup> samples genotyped at the Feinstein Institute using the Illumina 550K platform; 4) 129 subjects genotyped using the Illumina 550K platform at Children's Hospital of Philadelphia (CHOP) and deposited in I-ControlDB ([www.illumina.com/iControlDB](http://www.illumina.com/iControlDB), Illumina, San Diego, CA); and 5) 14 subjects from the NIH Laboratory of Neurogenetics (NIHLN) (<http://neurogenetics.nia.nih.gov/paperdata/public/>). For the Canadian (phase 2 of this study) these include: 1) 1118 M.D. Anderson historical controls genotyped using the 300K Illumina platform at the Center for Inherited Disease Research (CIDR, Johns Hopkins University); 2) 2210 subjects from the Cancer Genetics Markers of Susceptibility (CGEMS) genotyped using the 550K Illumina platform ([http://cgems.cancer.gov/resource\\_room/dbgap.asp](http://cgems.cancer.gov/resource_room/dbgap.asp)); and 3) 378 Canadian subjects genotyped using the 370K Illumina platform at the University of Toronto.

### **Data Filtering.**

We used stringent quality control criteria to ensure that high-quality data were included in the final analysis. Specifically, we excluded individuals who had >5% missing data and all individuals with cryptic relatedness and duplicate samples based on identity-by-state status ( $PI\_Hat > 0.10$ ) using PLINK<sup>4</sup>. The SNP data was carefully reviewed and exclusion criteria applied to minimize potential batch effects as described below. The application of these criteria was particularly important given the derivation of genotypes from multiple platforms typed in different laboratories.

We included only SNPs with <5% missing data, Hardy-Weinberg (H-W) equilibrium p values  $> 1 \times 10^{-4}$  in controls and  $> 1 \times 10^{-5}$  in combined cases and controls, minor allele frequency  $> 0.05\%$ . These procedures were applied in a stepwise

approach separately for the Italian and Canadian data sets. Thus, for each of the separately derived control genotyping sets (**Supplementary Table 1**), SNPs were excluded if they failed the above criteria within the individual control set (platform and laboratory) or in combination with any of the other control groups, or in the complete data set. The stringent H-W criteria were applied after exclusion of non-European individuals (see Ancestry). As another quality check, ten of the Italian controls genotyped on 1Mb platform at the University of Milan were also genotyped on the Illumina 610K platform at the Feinstein Institute together with the Italian PBC cases. The concordance of the genotypes from two different Illumina platforms genotyped at two different institutions was  $> 0.9998$  and SNPs not fully concordant were excluded. Finally, after selection of the Italian control data set (see Ancestry), SNPs were excluded if allele frequency differences between different control subject groups was  $> 10\%$ . For the Italian and Canadian study sets, 484,351 and 295,355 SNPs, respectively, passed these quality control steps. A total of 276,459 SNPs were common to both study groups and additional non-overlapping SNPs were imputed as described below (see **Imputation**).

### **Ancestry.**

European ancestry was determined using a panel of 187 ancestry informative markers and analyzed using the STRUCTURE v2.1<sup>5,6</sup> program and subjects of known European, Amerindian, East Asian and West African origin as previously described<sup>7</sup>. We used STRUCTURE to exclude non-European and admixed study participants since the application of this Bayesian clustering method allows exclusion/inclusion criteria to be set using reference populations. Unlike principal components analysis (PCA), the clustering algorithm can be run under conditions that are not affected by the inclusion of the unknown samples. Briefly, analyses were performed using  $> 100,000$  resamplings and  $> 50,000$  burn-in cycles under the admixture model. For all analyses reported, we

used the “infer  $\alpha$ ” option with a separate  $\alpha$  is estimated for each population (where  $\alpha$  is the Dirichlet parameter for degree of admixture). Runs were performed under the  $\lambda = 1$  option where  $\lambda$  estimates the prior probability of the allele frequency and is based on the Dirichlet distribution of allele frequencies. Subjects with >15% non-European ancestry were excluded from further analysis.

Homogeneous Italian ancestry was defined by applying principal components analyses (PCA) performed using the EIGENSTRAT statistical package<sup>8</sup>. The analyses were performed using genotypes from a diverse set of subjects of European origin after the STRUCTURE analysis described above. These included 492 European PBC cases collected in Italy, the 857 European normal controls collected by the Milan University group, the 1280 European NYCP subjects, the 1472 subjects from the CHOP study, 255 subjects from the (NIHLN), the 1317 subjects from the British Blood Bank 1958 cohort, 141 Sardinian subjects genotyped at University of Milan, 28 Sardinians and 13 Northern Italian and 7 Tuscan subjects from the Human Genome Diversity Panel obtained from I-ControlDB, 77 Tuscan subjects from HapMap phase III (<http://hapmap.ncbi.nlm.nih.gov/>) and 91 participants in the POPRES<sup>9</sup> study with 4 grandparent data indicated Italian origin were obtained from dbGaP (<http://www.ncbi.nlm.nih.gov/dbgap/>). We utilized a set of 34,000 genotypes common to multiple Illumina and Affymetrix platforms (since POPRES samples were genotyped using Affymetrix platform) that were selected to exclude regions of high linkage disequilibrium and exclude any paired SNPs with  $r^2$  values > 0.2. We defined homogenous Italian subgroup using the definition that each subject was within 2 standard deviations of the mean of each of the first four principal components of a reference Italian subject group. We utilized the POPRES and HGDP Italian subjects as the reference group since these subjects were not included in our

association testing. The results of the PCAs show the relationship of the homogeneous Italian population group among the diverse European subjects (**Supplementary Fig 1**).

### **Analytic Strategy and Association Testing Statistics.**

The data for this study was analyzed separately in the two different population groups: 1) the homogeneous Italian study set and 2) the expanded Canadian study set (**Supplementary Table 1**). The Canadian study set was used as an in silico replication set for putative SNPs identified in the Italian discovery group. In addition, the results from the two independently analyzed study sets were combined together in a meta-analysis applying Cochran–Mantel–Haenszel (CMH) adjustments using PLINK<sup>4,10</sup> which allows allele and disease frequencies to vary among study populations. For the discovery set we pre-set an  $\alpha$  criteria of  $p < 10^{-5}$  (corrected for population substructure and residual genome-wide inflation) as suggestive for association. For the replication (Canadian set) a Bonferroni correction was applied to ascertain the nominal p value corresponding to a false positive rate of  $p < 0.05$ . Since a total of 57 SNPs met the discovery criterion, the p value of  $8 \times 10^{-4}$  ( $0.05/57$ ) was used as the replication criterion. In addition, for the meta-analysis we applied the genome-wide criterion of  $p < 5 \times 10^{-8}$  for indicating significant association. We also checked for significant evidence of variation in the odds ratio associating disease alleles with PBC risk by applying Cochran's Q test of homogeneity<sup>10,11</sup>.

For both data sets association methods controlling for population substructure were applied. PCA was performed using EIGENSTRAT software<sup>8</sup> after exclusion of chromosomal regions with high linkage disequilibrium as previously discussed<sup>12</sup>. The population substructure was defined using the first three PCs with no further reduction of the residual genome-wide inflation factor. The homogeneous Italian subset showed a small genome-wide  $\chi^2$  inflation both before ( $\lambda_{gc} = 1.035$ ) and after eigenvalue correction

( $\lambda_{gc} = 1.033$ ). For the Canadian data, the initial  $\chi^2$  inflation ( $\lambda_{gc} = 1.85$ ) decreased to 1.050 after eigenvalue correction. The PCA results were used as covariates for logistic regression and the results were corrected for the small residual genome-wide  $\chi^2$  inflations. The analysis was performed using the PLINK software that also facilitated the combining results for the meta-analysis. The meta-analysis was performed using CMH adjustments for potential differences between the two study sets.

### **Imputation.**

Before imputation, we applied stringent quality control checks on each of the data sets. The imputations were performed separately for those cases and controls genotyped on platforms with 550K or more genotypes and those genotyped with 370K or less genotypes. We next used IMPUTE version 2<sup>13</sup> to infer genotypes using HapMap Phase III CEU and TSI samples as a reference. [Prior testing of multiple genomic regions indicated that combining CEU with TSI haplotypes enabled more accurate imputation than either set alone (MFS, unpublished data)]. For inclusion of data we utilized only imputed genotypes with mean uncertainty scores of  $< 0.05$  where the uncertainty is defined as the mean probability of assignment of each genotype (where if individual genotype probability  $< 0.5 =$  uncertainty and if probability  $> 0.5$ , uncertainty =  $1 -$  probability). Using this parameter our testing indicated that the maximum error rate for genotype assignment was  $< 0.05$  and the mean error rate was  $< 0.01$ .

SNPTEST was used as the primary association test for the imputed genotypes for SNPs. The SNPTEST software uses the genotype probabilities for the imputed SNPs. For SNPTEST, the first three PC eigenvalue scores were used as continuous variables in the association test.

## URLs.

CGEMS, <http://cgems.cancer.gov/>;

PLINK, <http://pngu.mgh.harvard.edu/~purcell/plink/>;

<http://genepath.med.harvard.edu/~reich/EIGENSTRAT.htm>;

SNPTEST, <http://www.stats.ox.ac.uk/~marchini/software/gwas/snpctest.html>;

IMPUTE, <https://mathgen.stats.ox.ac.uk/impute/impute.html>;

HAPMAP, <http://hapmap.ncbi.nlm.nih.gov/>;

dbGaP, <http://www.ncbi.nlm.nih.gov/sites/entrez?Db=gap>

## References

1. Lindor, K.D. et al. Primary biliary cirrhosis. *Hepatology* **50**, 291-308 (2009).
2. Hirschfield, G.M. et al. Primary biliary cirrhosis associated with HLA, IL12A, and IL12RB2 variants. *N Engl J Med* **360**, 2544-55 (2009).
3. Mitchell, M.K., Gregersen, P.K., Johnson, S., Parsons, R. & Vlahov, D. The New York Cancer project: rationale, organization, design, and baseline characteristics. *J Urban Health*. **81**, 301-310 (2004).
4. Purcell, S. et al. PLINK: a tool set for whole-genome association and population-based linkage analyses. *Am J Hum Genet* **81**, 559-75 (2007).
5. Pritchard, J.K., Stephens, M. & Donnelly, P. Inference of population structure using multilocus genotype data. *Genetics* **155**, 945-59 (2000).
6. Falush, D., Stephens, M. & Pritchard, J.K. Inference of population structure using multilocus genotype data: linked loci and correlated allele frequencies. *Genetics* **164**, 1567-87 (2003).
7. Kosoy, R. et al. Ancestry informative marker sets for determining continental origin and admixture proportions in common populations in America. *Hum Mutat* **30**, 69-78 (2009).
8. Price, A.L. et al. Principal components analysis corrects for stratification in genome-wide association studies. *Nat Genet* **38**, 904-9 (2006).
9. Nelson, M.R. et al. The Population Reference Sample, POPRES: a resource for population, disease, and pharmacological genetics research. *Am J Hum Genet* **83**, 347-58 (2008).
10. Saxena, R. et al. Genome-wide association analysis identifies loci for type 2 diabetes and triglyceride levels. *Science* **316**, 1331-6 (2007).
11. Cochran, W.G. The comparison of percentages in matched samples. *Biometrika* **37**, 256-66 (1950).



12. Tian, C., Gregersen, P.K. & Seldin, M.F. Accounting for ancestry: population substructure and genome-wide association studies. *Hum Mol Genet* **17**, R143-50 (2008).
13. Howie, B.N., Donnelly, P. & Marchini, J. A flexible and accurate genotype imputation method for the next generation of genome-wide association studies. *PLoS Genet* **5**, e1000529 (2009).
